# Supplementary material
Source: MDPI journal article supplement (https://www.mdpi.com/2073-4344/10/1/14)
Supplement: s1 [file s1]

Supporting Information

# Asymmetric Michael addition of malononitrile with chalcones via rosin-derived bifunctional squaramides

Ning Lin \*, Qiu-Xiang Wei, Li-Hua Jiang, Yan-Qiu Deng, Zhen-Wei Zhang \* and Qing Chen

College of Pharmacy, Guangxi Zhuang Yao Medicine Center of Engineering and Technology, Guangxi University of Chinese Medicine, Nanning, Guangxi 530200, P. R. of China; linning@gxtcmu.edu.cn; charliezh@163.com

\* Correspondence: linning@gxtcmu.edu.cn (N.L.); charliezh@163.com (Z.-W.Z.); Tel.: +86-188-0771-8996 (N.L.); +86-181-6964-8696 (Z.-W.Z.)

## List of Contents

1. NMR spectra of compounds 4a-q S2
  2. HPLC spectra of racemic and chiral products 4a-q S11
1. NMR spectra of compounds 4a-q  
<sup>1</sup>HNMR of compound 4a (in CDCl<sub>3</sub>):

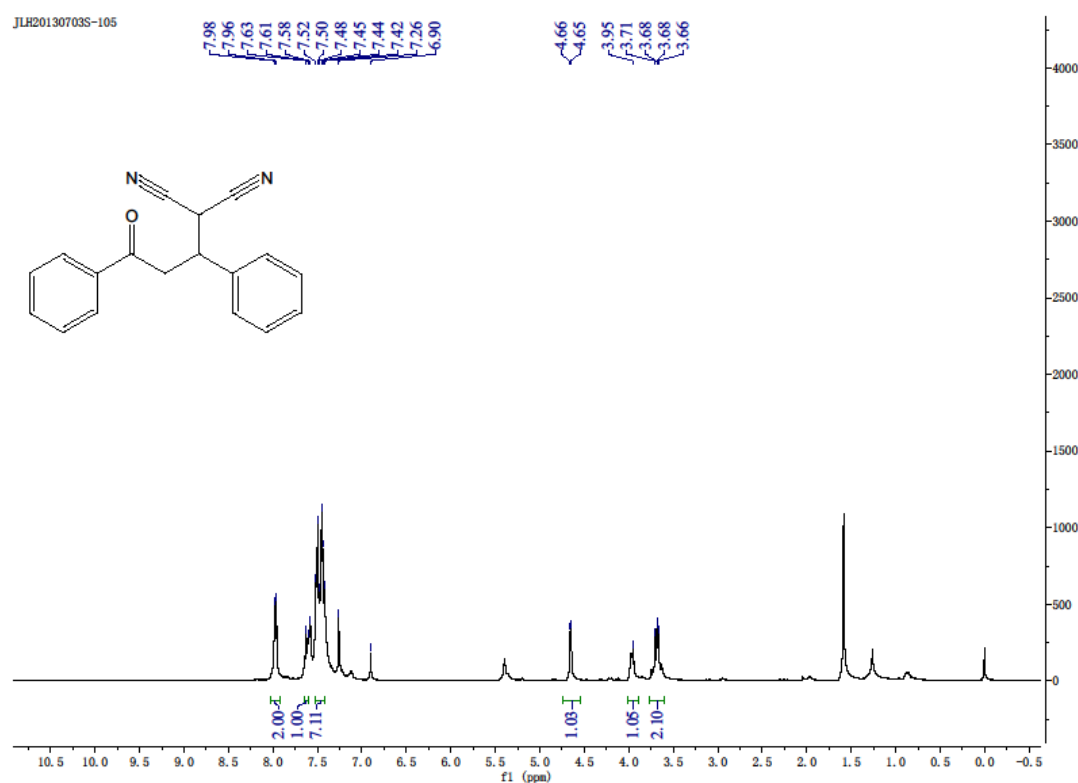

<sup>1</sup>HNMR of compound 4b (in CDCl<sub>3</sub>):

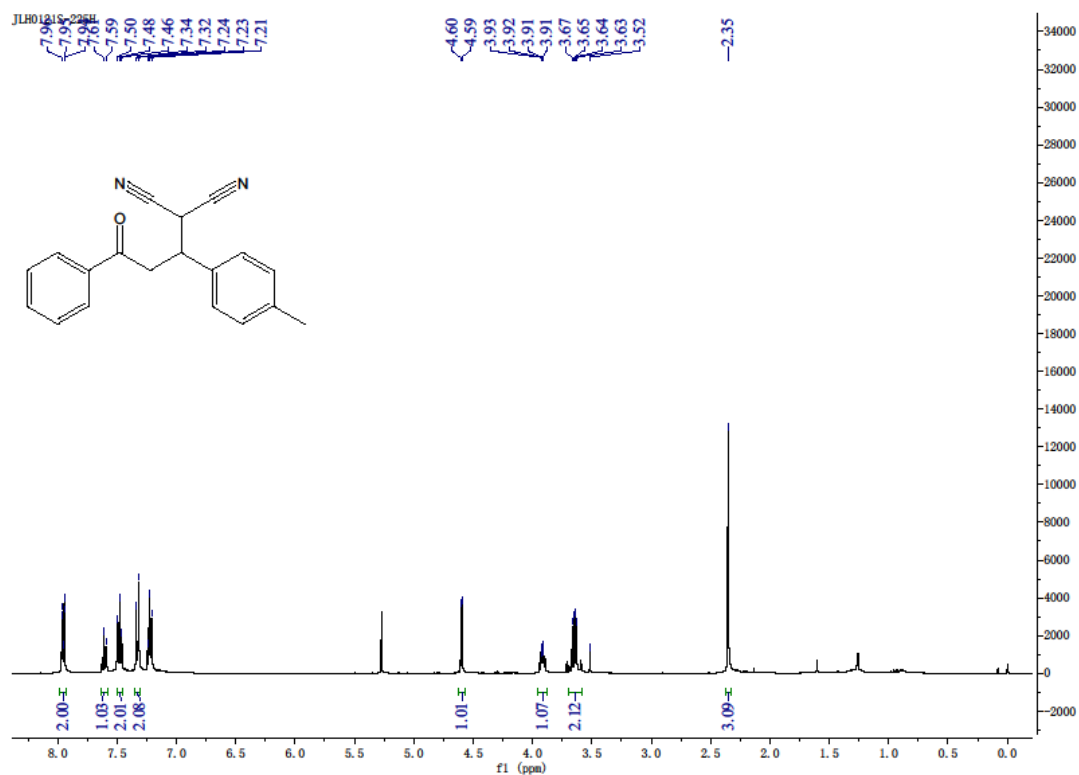

<sup>1</sup>H NMR of compound **4c** (in CDCl<sub>3</sub>):

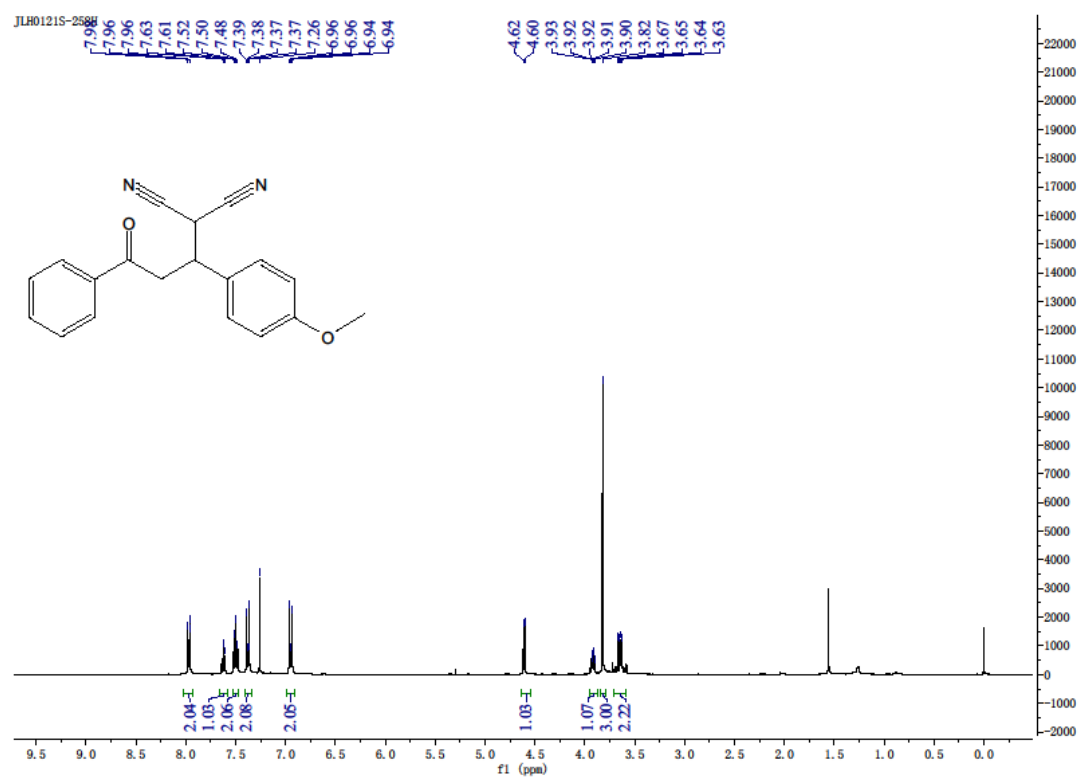

<sup>1</sup>H NMR of compound **4d** (in CDCl<sub>3</sub>):

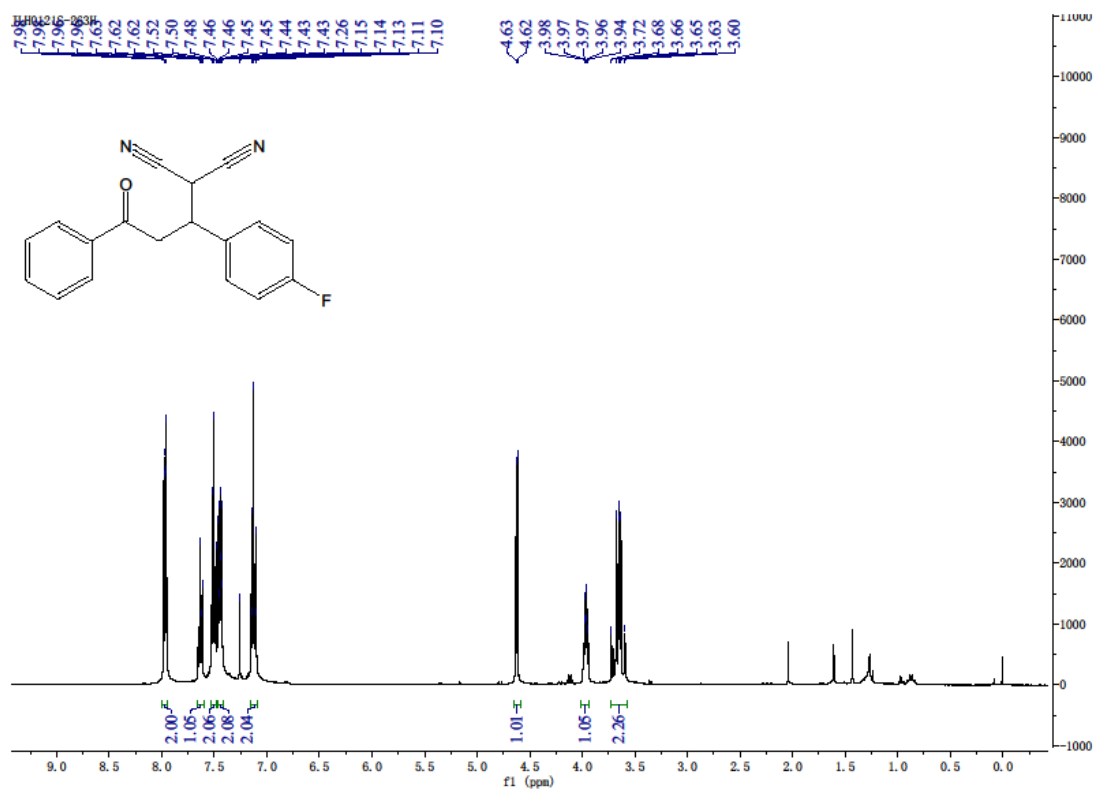

<sup>1</sup>H NMR of compound **4e** (in CDCl<sub>3</sub>):

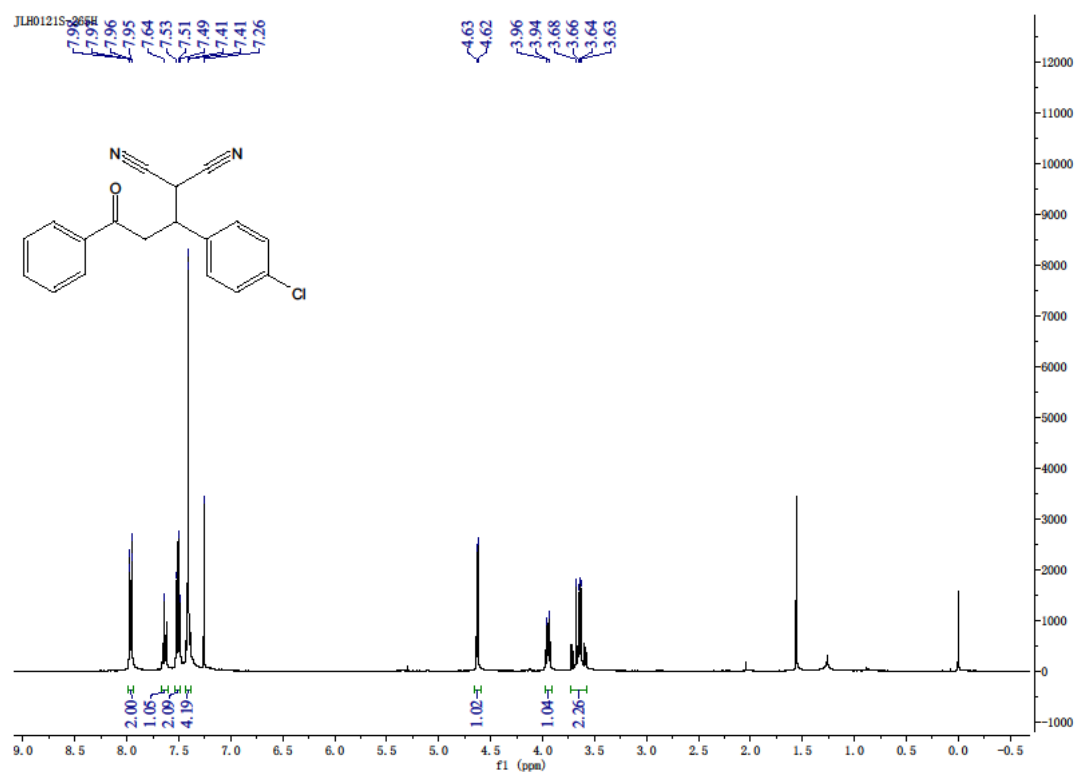

<sup>1</sup>H NMR of compound **4f** (in CDCl<sub>3</sub>):

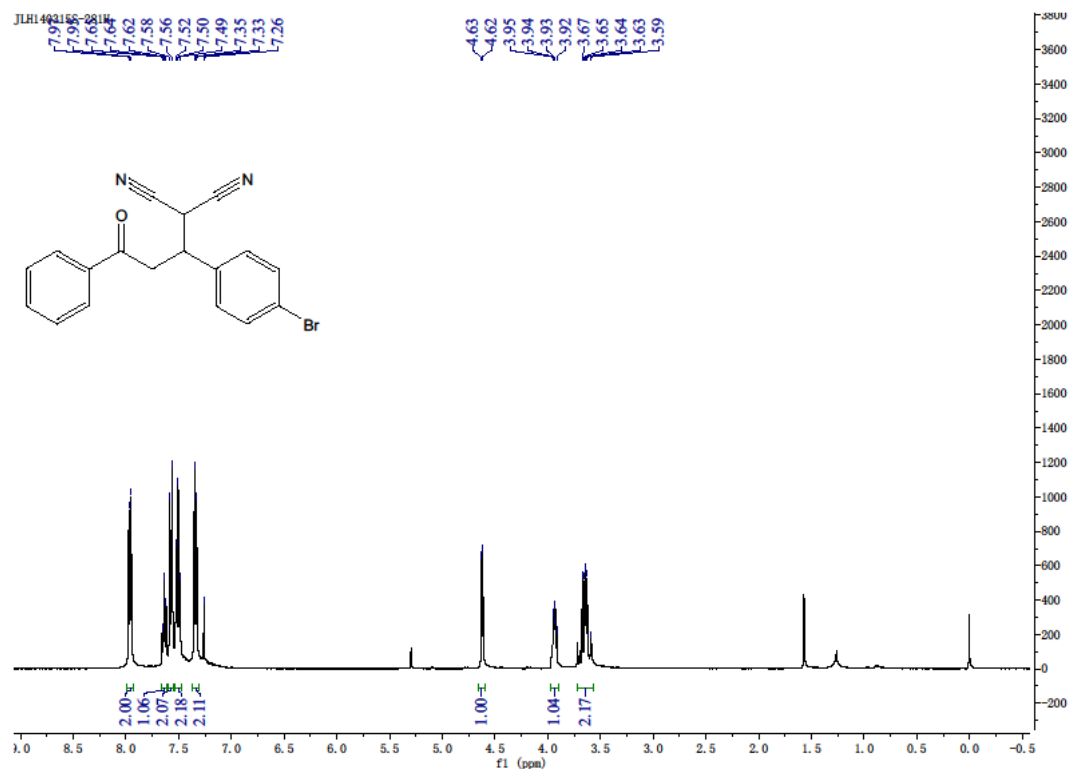

<sup>1</sup>H NMR of compound **4g** (in CDCl<sub>3</sub>):

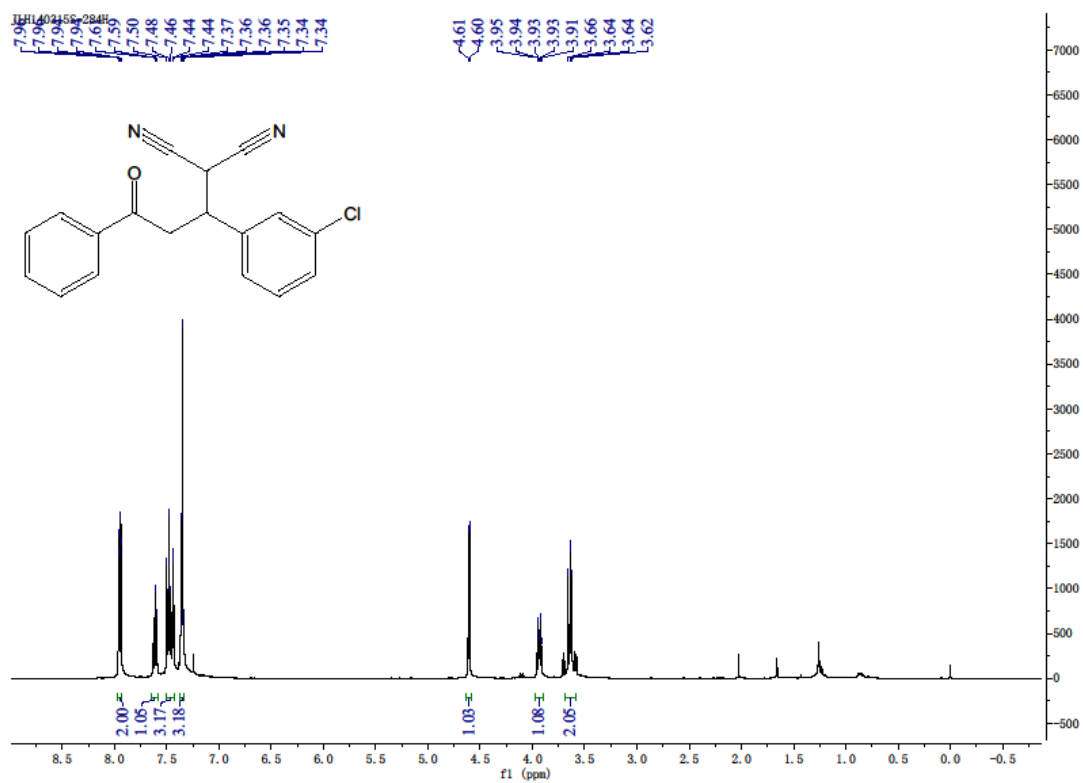

<sup>1</sup>H NMR of compound **4h** (in CDCl<sub>3</sub>):

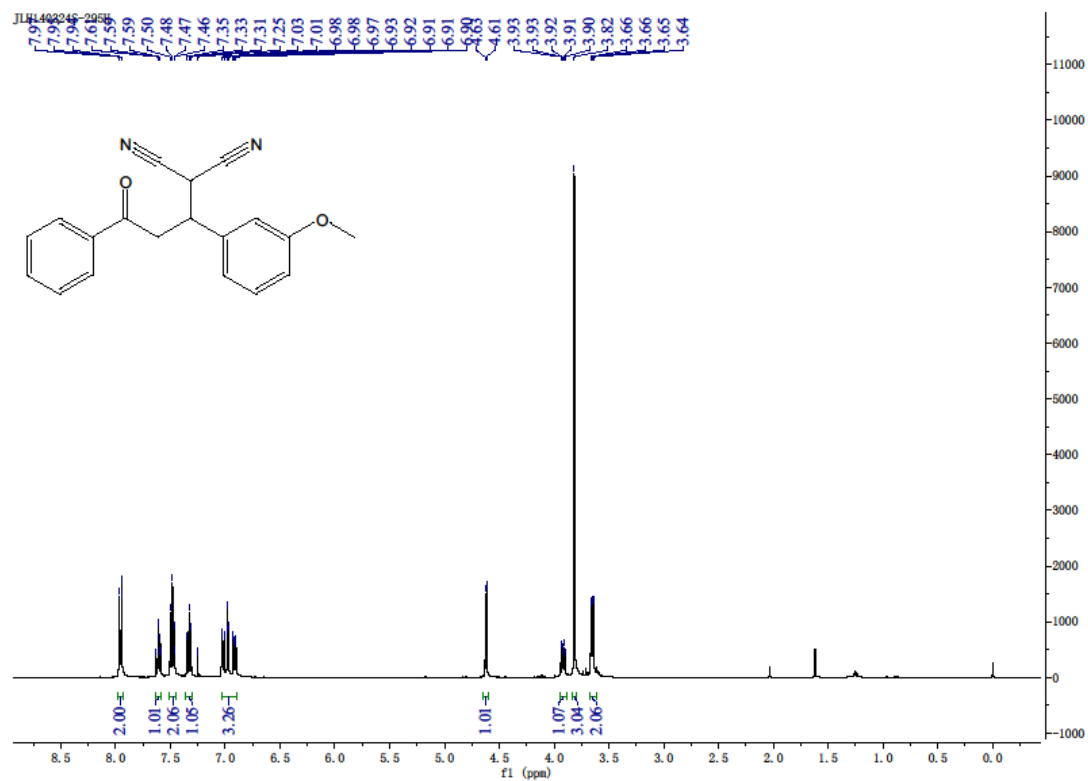

<sup>1</sup>H NMR of compound **4i** (in CDCl<sub>3</sub>):

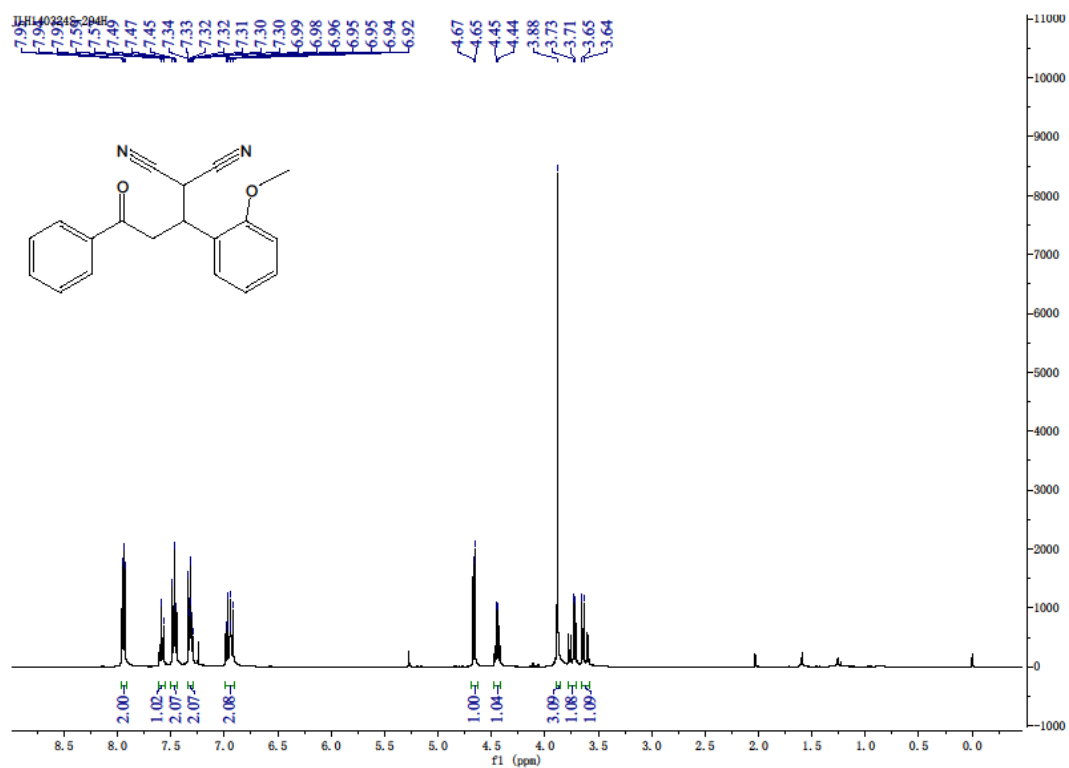

$^1\text{H}$ NMR of compound **4j** (in  $\text{CDCl}_3$ ):

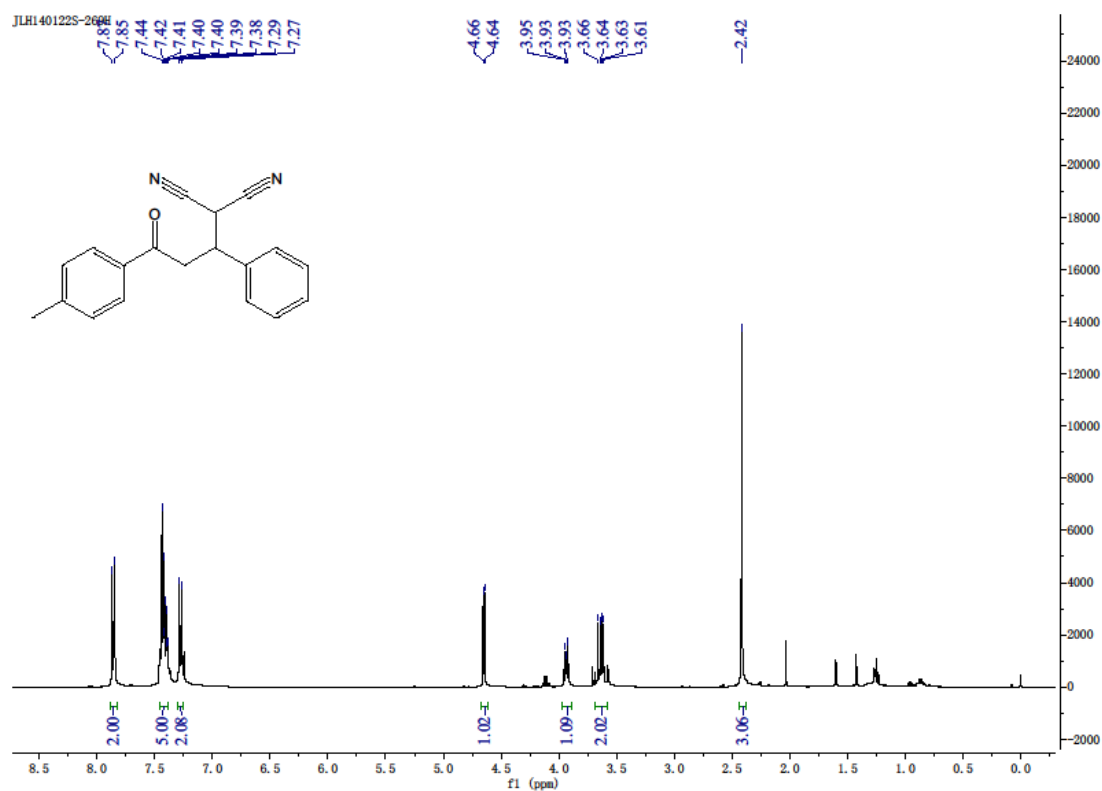

$^1\text{H}$ NMR of compound **4k** (in  $\text{CDCl}_3$ ):

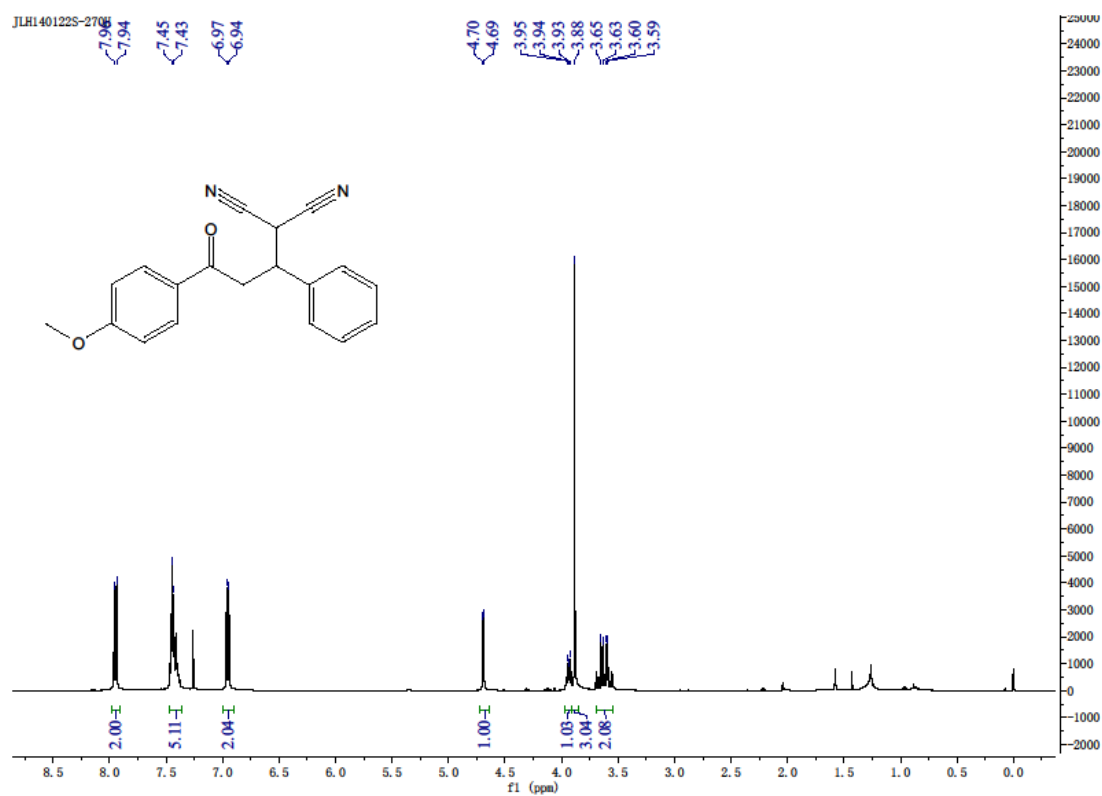

$^1\text{H}$ NMR of compound **4l** (in  $\text{CDCl}_3$ ):

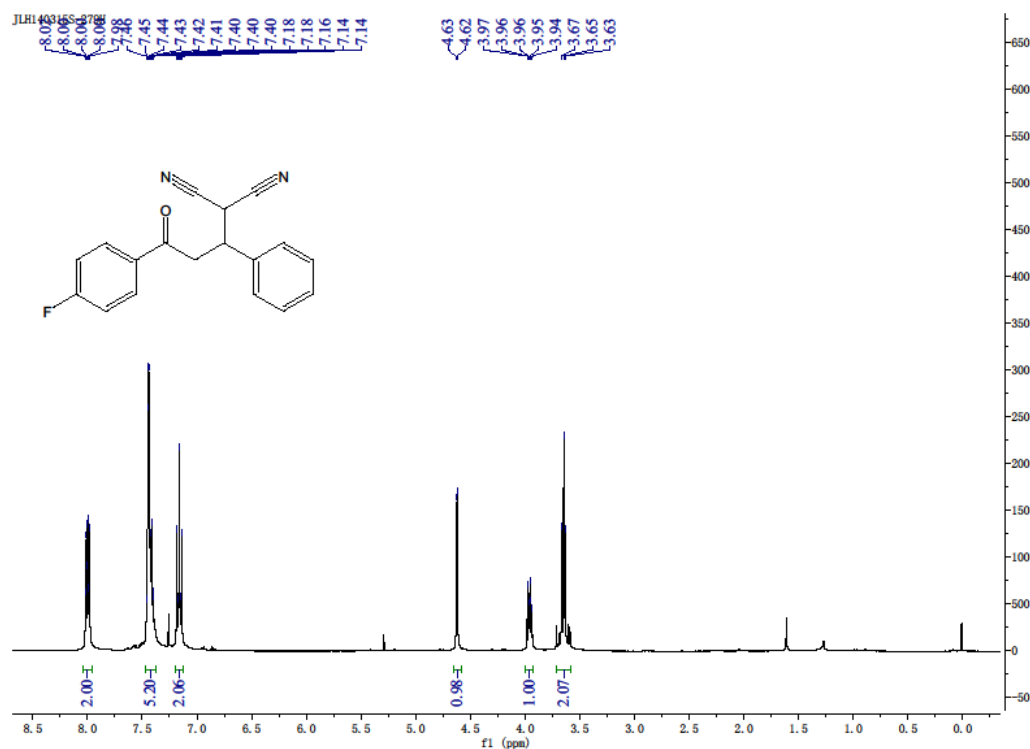

$^1\text{H}$ NMR of compound **4m** (in  $\text{CDCl}_3$ ):

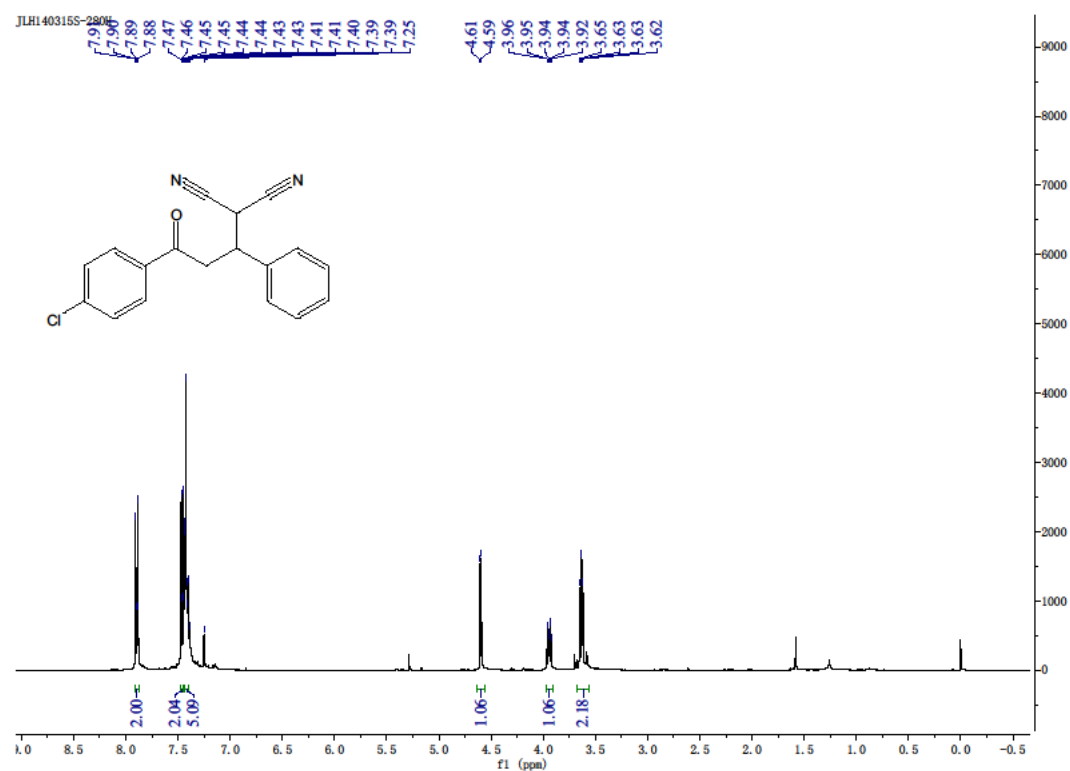

$^1\text{H}$ NMR of compound **4n** (in  $\text{CDCl}_3$ ):

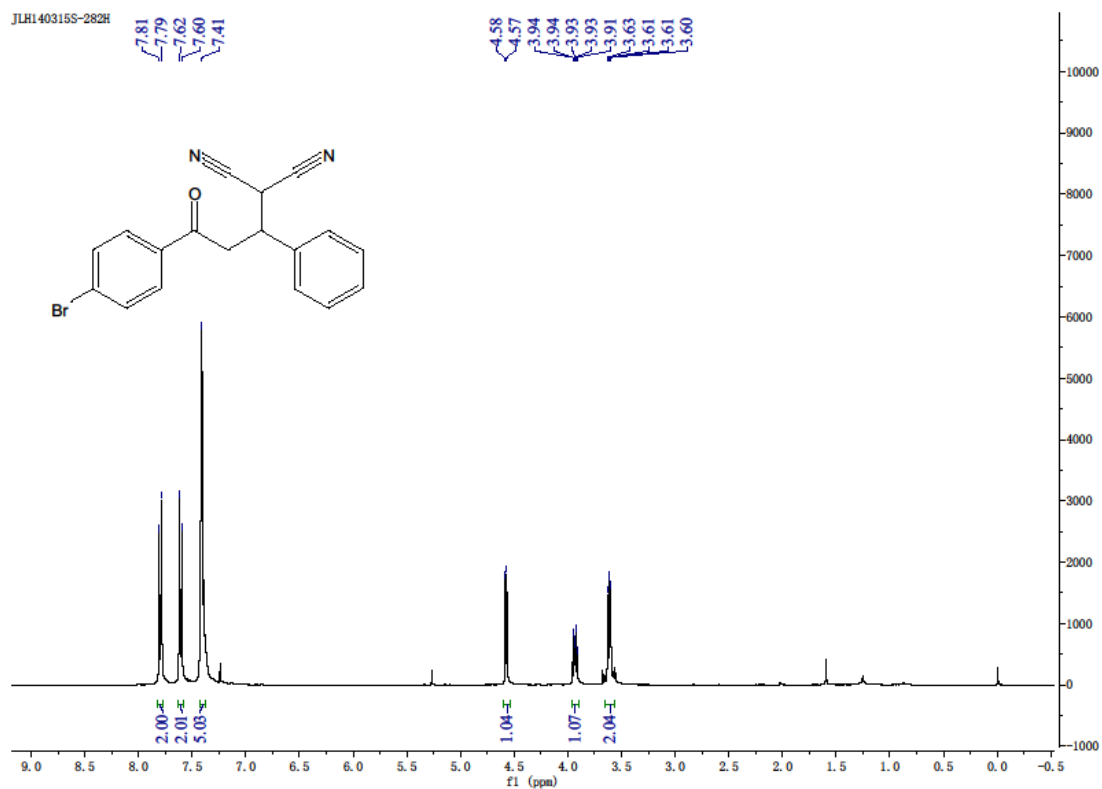

<sup>1</sup>H NMR of compound **4o** (in CDCl<sub>3</sub>):

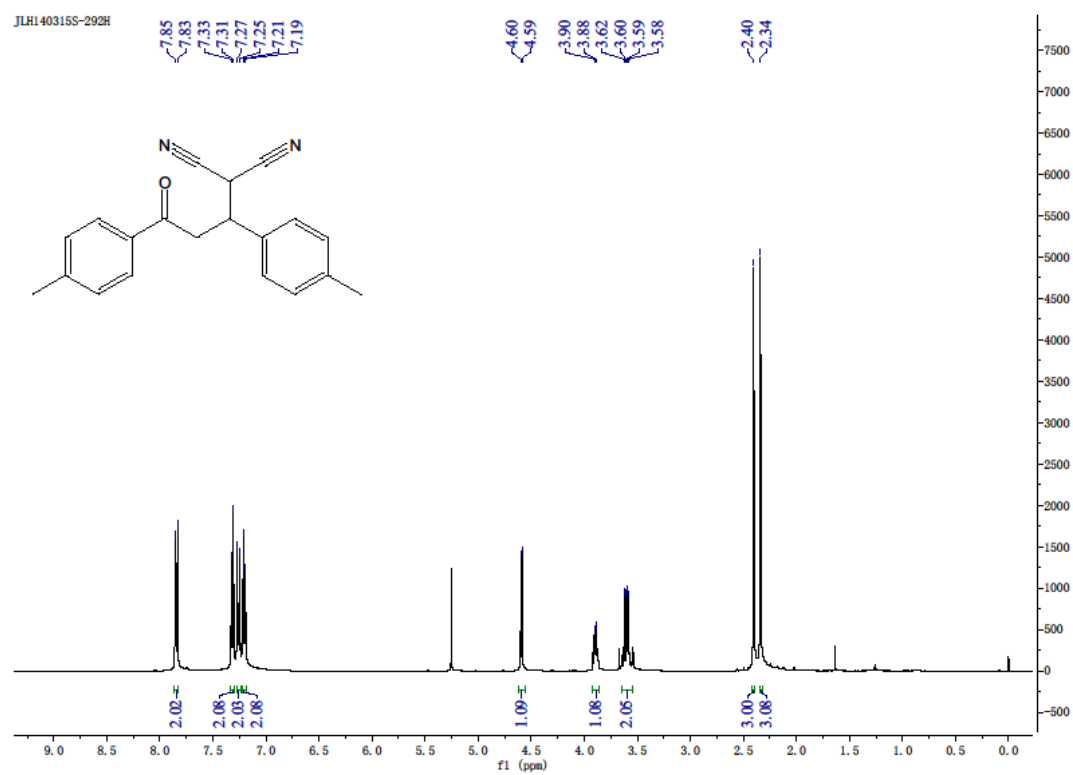

<sup>1</sup>H NMR of compound **4p** (in CDCl<sub>3</sub>):



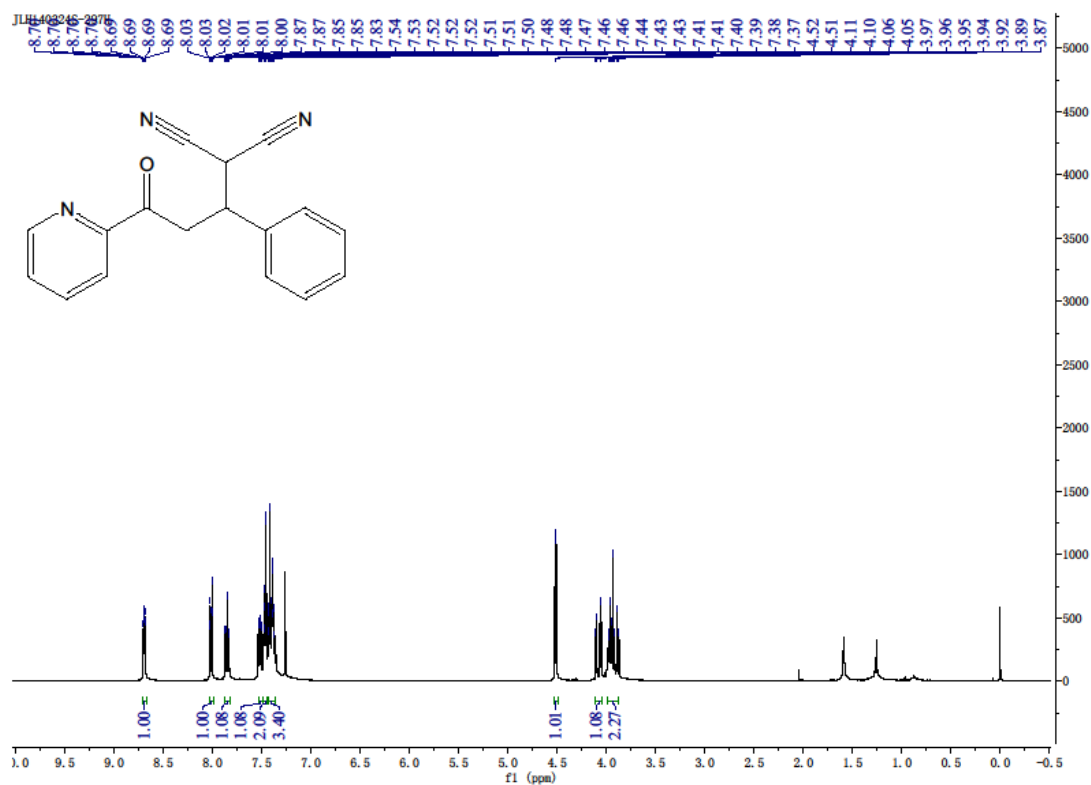

<sup>1</sup>H NMR of compound **4q** (in CDCl<sub>3</sub>):

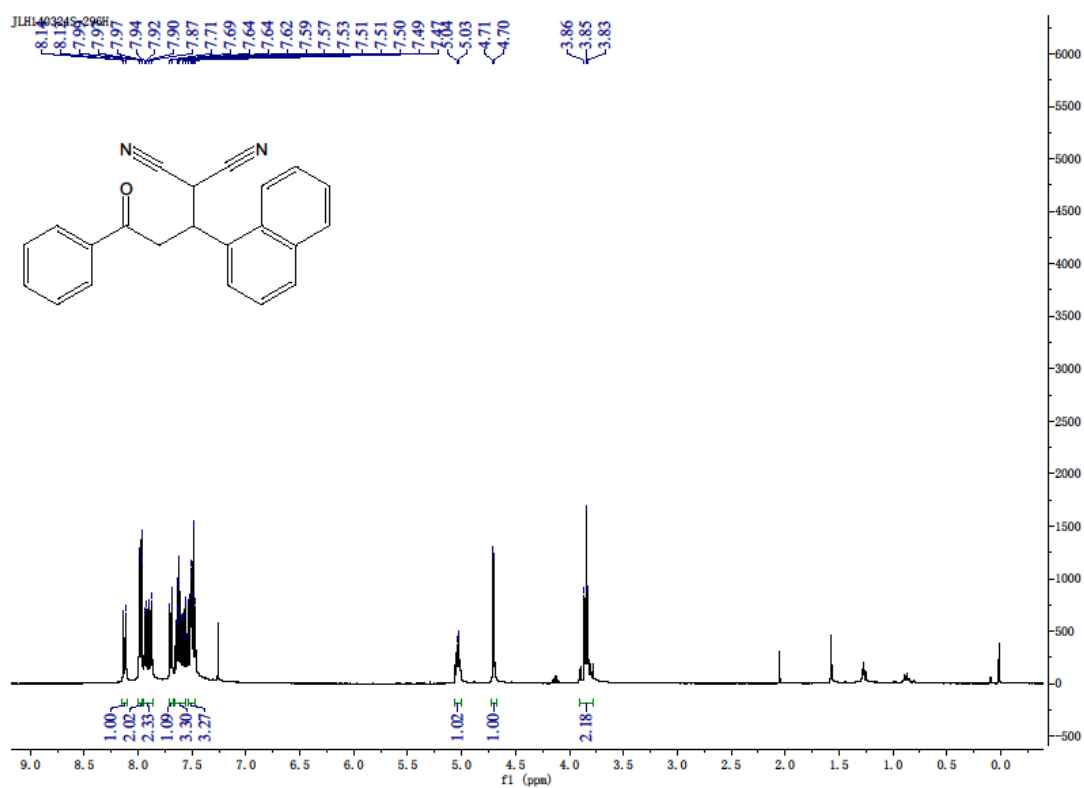

## 2. HPLC spectra of racemic and chiral products **4a-q**

HPLC spectra of compound **4a** (racemic and chiral product):

数据文件: D:\CHEMSTATION DATA\JIANGLIHUA\JLH140115X.D  
 样品名称: JLH140115X

```
=====
操作者       : jlh
仪器         : 仪器 1                      位置 : 样品瓶 1
进样日期     : 2014-1-15 10:07:49
采集方法     : C:\CHEM32\1\METHODS\JLH2013.M
最后修改     : 2014-1-7 23:32:57 : JLH
分析方法     : C:\CHEM32\1\METHODS\DEF.LC.M
最后修改     : 2014-3-26 12:16:00 : ///////////////
              (调用后修改)
样品信息     : OD-H3, hex :ipr =75:25, 0.8mL/min, 60bar, 10uL
=====
```

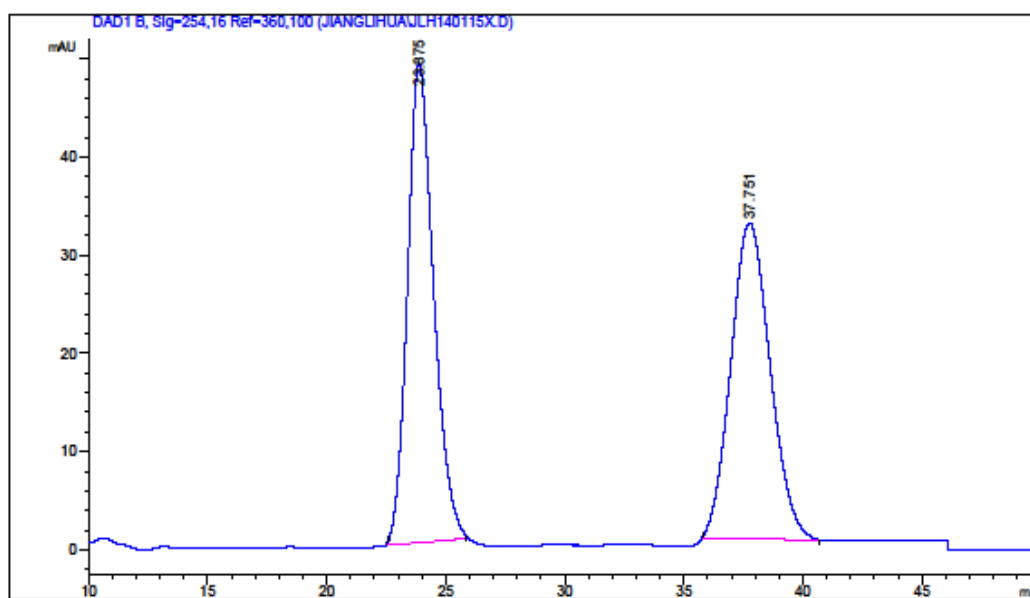

#### 面积百分比报告

```
=====
排序           : 信号
乘积因子       : 1.0000
稀释因子       : 1.0000
内标使用乘积因子和稀释因子
=====
```

信号 1: DAD1 B, Sig=254,16 Ref=360,100

| 峰 # | 保留时间 [min] | 类型 | 峰宽 [min] | 峰面积 [mAU*s] | 峰高 [mAU] | 峰面积 %   |
|-----|------------|----|----------|-------------|----------|---------|
| 1   | 23.875     | BB | 1.1215   | 3716.07739  | 48.73959 | 50.1723 |
| 2   | 37.751     | BB | 1.4876   | 3690.55786  | 32.18858 | 49.8277 |

总量 : 7406.63525 80.92817

\*\*\* 报告结束 \*\*\*

数据文件: D:\CHEMSTATION DATA\JIANGLIHUA\JLH1119S-180.D  
 样品名称: jlh1119s-180

```
=====
操作者       : jlh
仪器         : 仪器 1                      位置 : 样品瓶 1
进样日期     : 2013-11-19 11:59:37
采集方法     : C:\CHEM32\1\METHODS\OUYBL-98-05.M
最后修改     : 2013-11-19 11:28:15 : jlh
分析方法     : C:\CHEM32\1\METHODS\DEF_LC.M
最后修改     : 2014-3-26 12:16:00 : ///////////////
              (调用后修改)
样品信息     : OD-H-2, hex :ipr =80:20 0.8mL/min, 51bar, 10uL
=====
```

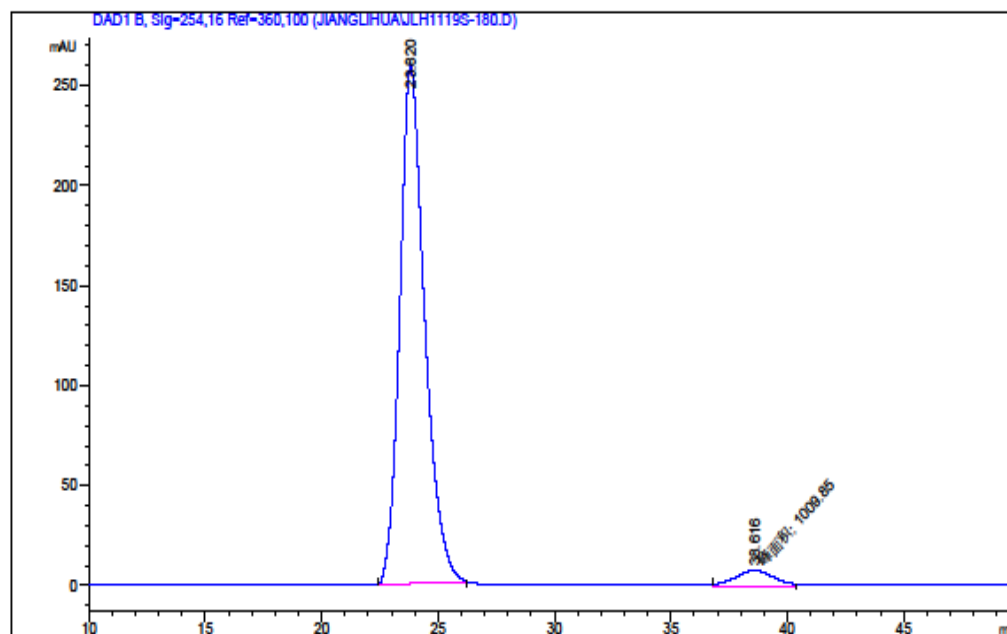

#### 面积百分比报告

```
=====
排序          :      信号
乘积因子      :      1.0000
稀释因子      :      1.0000
内标使用乘积因子和稀释因子
=====
```

信号 1: DAD1 B, Sig=254,16 Ref=360,100

| 峰 # | 保留时间 [min] | 类型 | 峰宽 [min] | 峰面积 [mAU*s] | 峰高 [mAU]  | 峰面积 %   |
|-----|------------|----|----------|-------------|-----------|---------|
| 1   | 23.820     | BB | 1.0890   | 1.92431e4   | 259.54034 | 95.0138 |
| 2   | 38.616     | MM | 2.0286   | 1009.84583  | 8.29668   | 4.9862  |

总量 : 2.02529e4 267.83703

\*\*\* 报告结束 \*\*\*

仪器 1 2014-3-26 12:21:32 ///////////////

页 1/1

HPLC spectra of compound **4b** (racemic and chiral product):

数据文件: D:\CHEMSTATION DATA\JIANGLIHUA\JLH140120S-260X.D  
 样品名称: JLH140120S-260X

```

=====
操作者       : jlh
仪器         : 仪器 1                      位置 : 样品瓶 1
进样日期     : 2014-1-20 20:46:04
采集方法     : C:\CHEM32\1\METHODS\JLH2013.M
最后修改     : 2014-1-20 19:04:34 : jlh
               (调用后修改)
分析方法     : C:\CHEM32\1\METHODS\DEF_LC.M
最后修改     : 2014-3-26 10:20:12 : ////////////////
               (调用后修改)
样品信息     : AD-H, hex :ipr =80:20, 0.8mL/min,45bar,10uL
=====
  
```

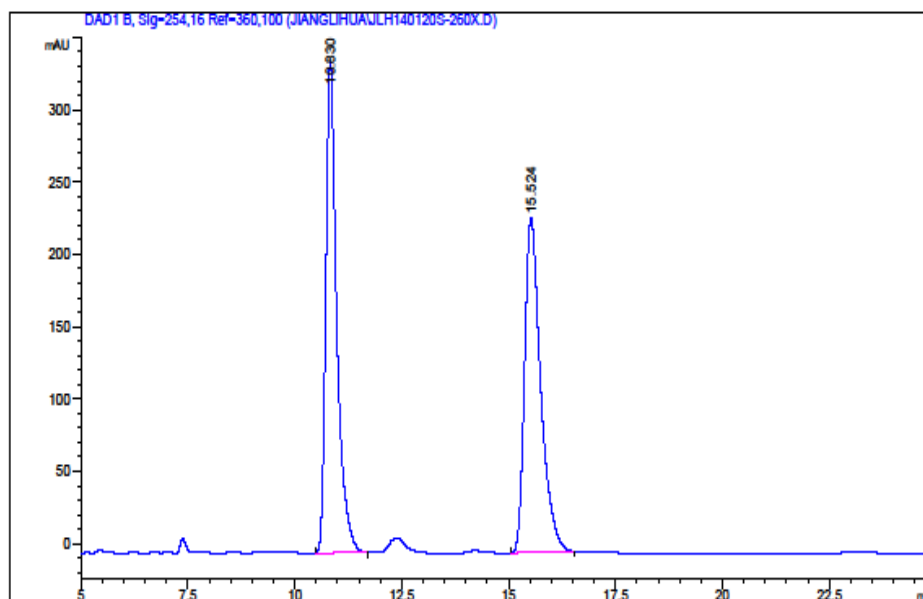

=====  
 面积百分比报告  
 =====

```

排序          : 信号
乘积因子      :      1.0000
稀释因子      :      1.0000
内标使用乘积因子和稀释因子
  
```

信号 1: DAD1 B, Sig=254,16 Ref=360,100

| 峰 # | 保留时间 [min] | 类型 | 峰宽 [min] | 峰面积 [mAU*s] | 峰高 [mAU]  | 峰面积 %   |
|-----|------------|----|----------|-------------|-----------|---------|
| 1   | 10.830     | BB | 0.2639   | 6051.39063  | 339.59271 | 50.1784 |
| 2   | 15.524     | BB | 0.3884   | 6008.35449  | 231.84073 | 49.8216 |

总量 : 1.20597e4 571.43344

=====  
 \*\*\* 报告结束 \*\*\*

数据文件: D:\CHEMSTATION DATA\JIANGLIHUA\JLH140120S-260.D  
 样品名称: JLH140120S-260

```
=====
操作者       : jlh
仪器         : 仪器 1                      位置 : 样品瓶 1
进样日期     : 2014-1-20 21:35:07
采集方法     : C:\CHEM32\1\METHODS\JLH2013.M
最后修改     : 2014-1-20 21:33:25 : jlh
              (调用后修改)
分析方法     : C:\CHEM32\1\METHODS\DEF_LC.M
最后修改     : 2014-3-26 10:20:12 : ////////////////
              (调用后修改)
样品信息     : AD-H, hex :ipr =80:20, 0.8mL/min,45bar,10uL
=====
```

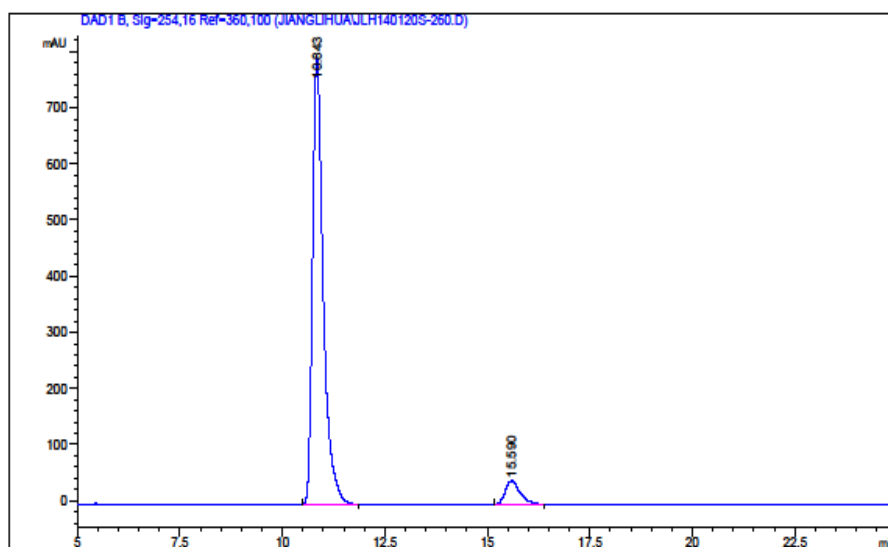

#### 面积百分比报告

```
=====
排序           : 信号
乘积因子       : 1.0000
稀释因子       : 1.0000
内标使用乘积因子和稀释因子
=====
```

信号 1: DAD1 B, Sig=254,16 Ref=360,100

| 峰 # | 保留时间 [min] | 类型 | 峰宽 [min] | 峰面积 [mAU*s] | 峰高 [mAU]  | 峰面积 %   |
|-----|------------|----|----------|-------------|-----------|---------|
| 1   | 10.843     | BB | 0.2700   | 1.44443e4   | 794.89154 | 93.1301 |
| 2   | 15.590     | BB | 0.3804   | 1065.51233  | 41.93516  | 6.8699  |

总量 : 1.55098e4 836.82670

\*\*\* 报告结束 \*\*\*

仪器 1 2014-3-26 10:32:02 ////////////////

页 1/1

HPLC spectra of compound **4c** (racemic and chiral product):

数据文件: D:\CHEMSTATION DATA\JIANGLIHUA\JLH140119S-259X1.D  
 样品名称: JLH140119S-259X1

```
=====
操作者       : jlh
仪器         : 仪器 1                      位置 : 样品瓶 1
进样日期     : 2014-1-20 16:30:54
采集方法     : C:\CHEM32\1\METHODS\JLH2013.M
最后修改     : 2014-1-20 16:08:36 : jlh
              (调用后修改)
分析方法     : C:\CHEM32\1\METHODS\DEF_LC.M
最后修改     : 2014-3-26 10:33:22 : ///////////////
              (调用后修改)
样品信息     : AD-H, hex :ipr =80:20, 0.6mL/min,45bar,10uL
=====
```

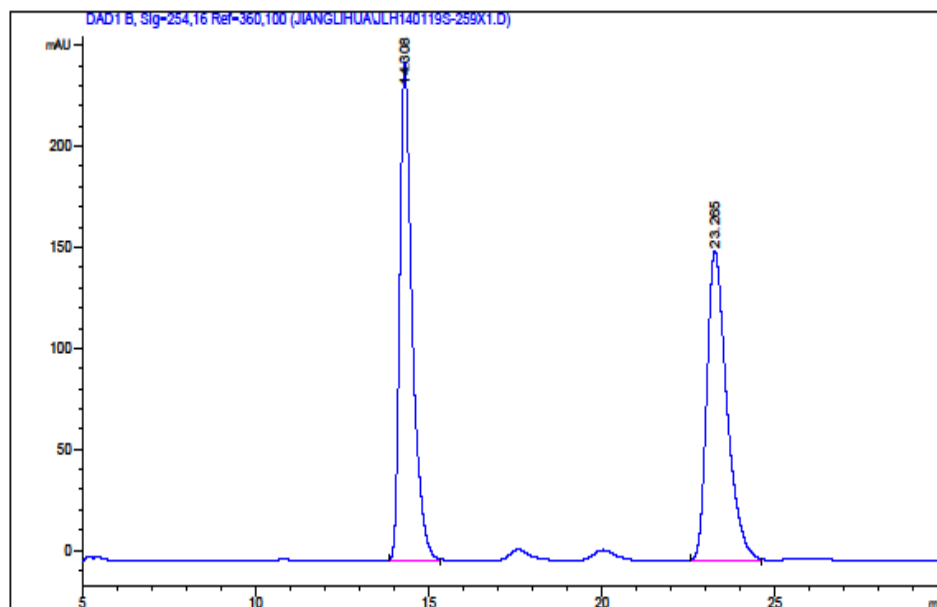

#### 面积百分比报告

```
=====
排序           :      信号
乘积因子       :      1.0000
稀释因子       :      1.0000
内标使用乘积因子和稀释因子
=====
```

信号 1: DAD1 B, Sig=254,16 Ref=360,100

| 峰 # | 保留时间 [min] | 类型 | 峰宽 [min] | 峰面积 [mAU*s] | 峰高 [mAU]  | 峰面积 %   |
|-----|------------|----|----------|-------------|-----------|---------|
| 1   | 14.308     | BB | 0.3687   | 6150.27539  | 246.86240 | 50.1750 |
| 2   | 23.265     | BB | 0.6041   | 6107.38135  | 152.86763 | 49.8250 |

总量 : 1.22577e4 399.73003

\*\*\* 报告结束 \*\*\*

数据文件: D:\CHEMSTATION DATA\JIANGLIHUA\JLH1401198-259.D  
 样品名称: JLH1401198-259

```

=====
操作者       : jlh
仪器         : 仪器 1                      位置 : 样品瓶 1
进样日期     : 2014-1-20 17:11:20
采集方法     : C:\CHEM32\1\METHODS\JLH2013.M
最后修改     : 2014-1-20 17:09:04 : jlh
              (调用后修改)
分析方法     : C:\CHEM32\1\METHODS\DEF_LC.M
最后修改     : 2014-3-26 10:33:22 : ///////////////
              (调用后修改)
样品信息     : AD-H, hex :ipr =80:20, 0.8mL/min,45bar,10uL
=====
  
```

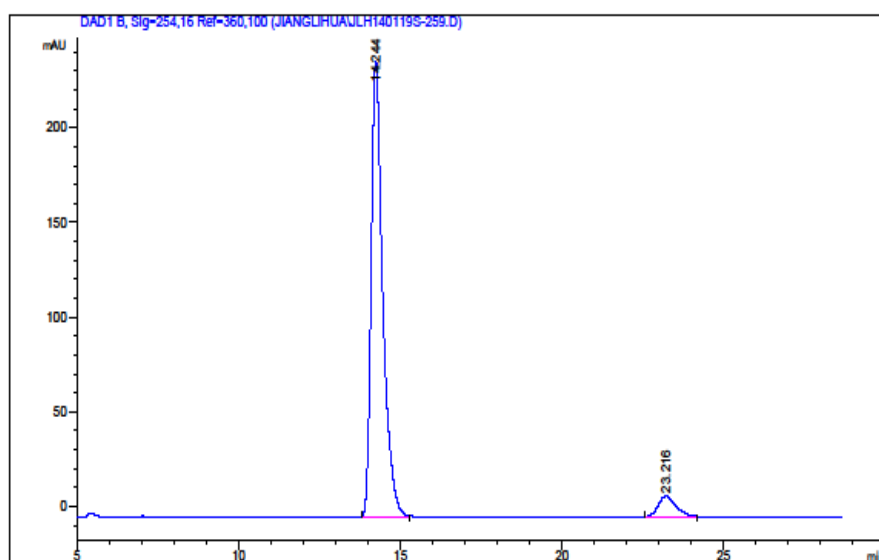

#### 面积百分比报告

```

=====
排序           : 信号
乘积因子       : 1.0000
稀释因子       : 1.0000
内标使用乘积因子和稀释因子
=====
  
```

信号 1: DAD1 B, Sig=254,16 Ref=360,100

| 峰 # | 保留时间 [min] | 类型 | 峰宽 [min] | 峰面积 [mAU*s] | 峰高 [mAU]  | 峰面积 %   |
|-----|------------|----|----------|-------------|-----------|---------|
| 1   | 14.244     | BB | 0.3663   | 5947.43359  | 240.64140 | 93.4784 |
| 2   | 23.216     | BB | 0.5685   | 414.92914   | 10.89096  | 6.5216  |

总量 : 6362.36273 251.53236

\*\*\* 报告结束 \*\*\*

仪器 1 2014-3-26 10:34:17 ///////////////

页 1/1

HPLC spectra of compound **4d** (racemic and chiral product):

数据文件: D:\CHEMSTATION DATA\JIANGLIHUA\JLH140120S-264X.D  
 样品名称: JLH140120S-264X

```

=====
操作者       : jlh
仪器         : 仪器 1                      位置 : 样品瓶 1
进样日期     : 2014-1-20 17:42:27
采集方法     : C:\CHEM32\1\METHODS\JLH2013.M
最后修改     : 2014-1-20 17:40:26 : jlh
              (调用后修改)
分析方法     : C:\CHEM32\1\METHODS\DEF_LC.M
最后修改     : 2014-3-26 10:20:12 : //////////////////////////////////
              (调用后修改)
样品信息     : AD-H, hex :ipr =80:20, 0.8mL/min,45bar,10uL
=====
  
```

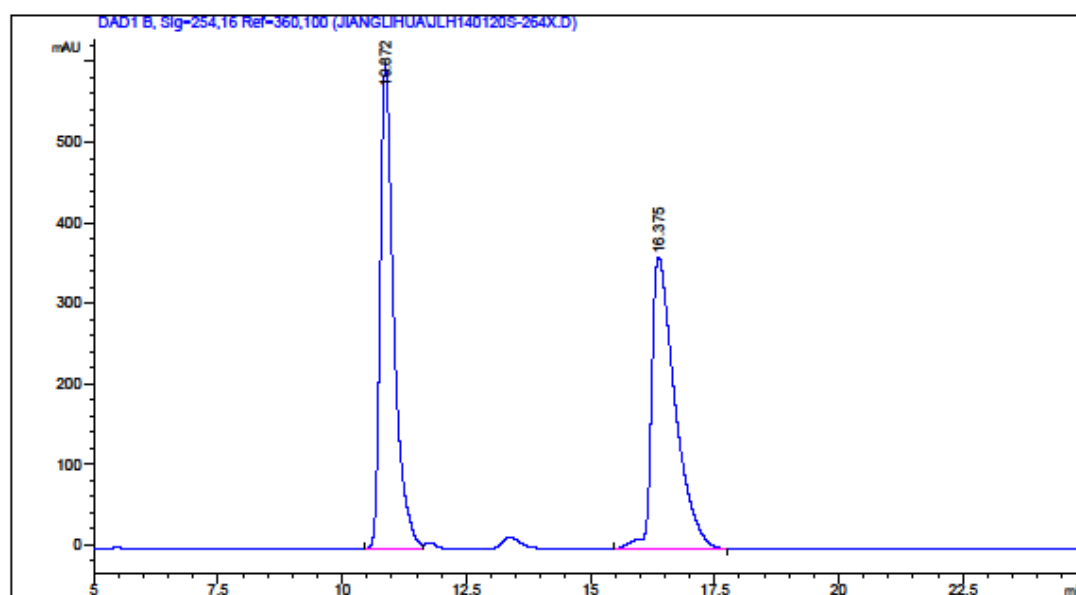

#### 面积百分比报告

```

=====
排序          :      信号
乘积因子:      :      1.0000
稀释因子:      :      1.0000
内标使用乘积因子和稀释因子
=====
  
```

信号 1: DAD1 B, Sig=254,16 Ref=360,100

| 峰 # | 保留时间 [min] | 类型 | 峰宽 [min] | 峰面积 [mAU*s] | 峰高 [mAU]  | 峰面积 %   |
|-----|------------|----|----------|-------------|-----------|---------|
| 1   | 10.872     | BV | 0.2831   | 1.15269e4   | 602.65735 | 49.2370 |
| 2   | 16.375     | BB | 0.4839   | 1.18841e4   | 363.07870 | 50.7630 |

总量 : 2.34110e4 965.73605

\*\*\* 报告结束 \*\*\*



数据文件: D:\CHEMSTATION DATA\JIANGLIHUA\JLH140122S-264.D  
 样品名称: JLH140122S-264

```
=====
操作者       : jlh
仪器         : 仪器 1                      位置 : 样品瓶 1
进样日期     : 2014-1-22 15:22:06
采集方法     : C:\CHEM32\1\METHODS\JLH2013.M
最后修改     : 2014-1-22 15:20:53 : jlh
              (调用后修改)
分析方法     : C:\CHEM32\1\METHODS\DEF_LC.M
最后修改     : 2014-4-8 20:12:32 : fyh
              (调用后修改)
样品信息     : AD-H, hex :ipr =80:20, 0.8mL/min,47bar,10uL
=====
```

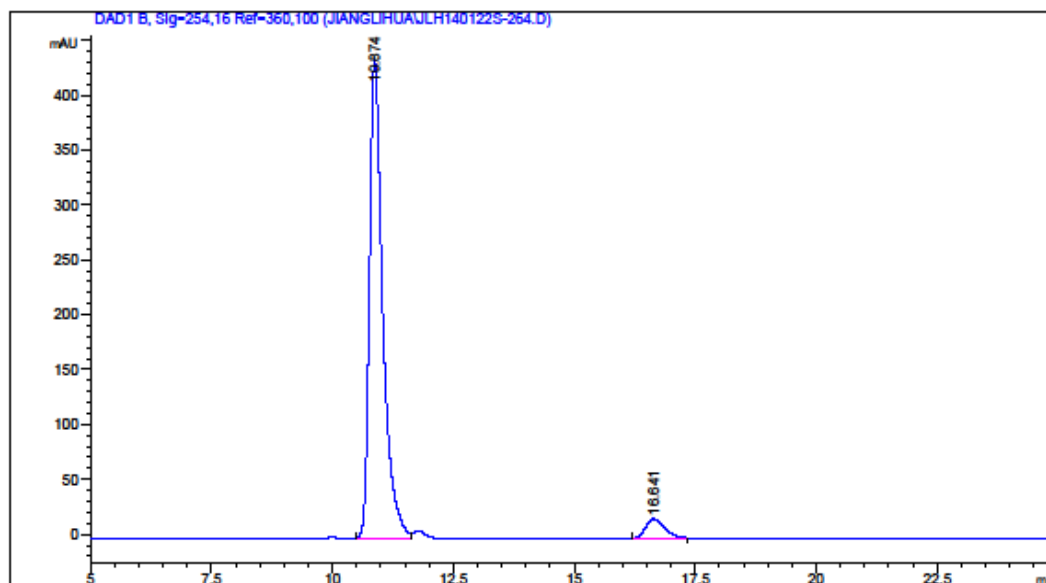

#### 面积百分比报告

```
=====
排序          : 信号
乘积因子:      : 1.0000
稀释因子:      : 1.0000
内标使用乘积因子和稀释因子
=====
```

信号 1: DAD1 B, Sig=254,16 Ref=360,100

| 峰 # | 保留时间 [min] | 类型 | 峰宽 [min] | 峰面积 [mAU*s] | 峰高 [mAU]  | 峰面积 %   |
|-----|------------|----|----------|-------------|-----------|---------|
| 1   | 10.874     | BV | 0.2841   | 8300.15625  | 435.95801 | 94.7295 |
| 2   | 16.641     | BB | 0.4018   | 461.80240   | 17.38899  | 5.2705  |

总量 : 8761.95865 453.34700

\*\*\* 报告结束 \*\*\*

仪器 1 2014-4-8 20:12:39 fyh

页 1/1

HPLC spectra of compound **4e** (racemic and chiral product):

数据文件: D:\CHEMSTATION DATA\JIANGLIHUA\JLH140121S-266X.D  
 样品名称: JLH140121S-266X

```
=====
操作者       : jlh
仪器         : 仪器 1                      位置 : 样品瓶 1
进样日期     : 2014-1-21 13:10:06
采集方法     : C:\CHEM32\1\METHODS\JLH2013.M
最后修改     : 2014-1-21 12:32:31 : jlh
              (调用后修改)
分析方法     : C:\CHEM32\1\METHODS\DEF_LC.M
最后修改     : 2014-3-26 10:20:12 : ////////////////
              (调用后修改)
样品信息     : AD-H, hex :ipr =80:20, 0.8mL/min,45bar,10uL
=====
```

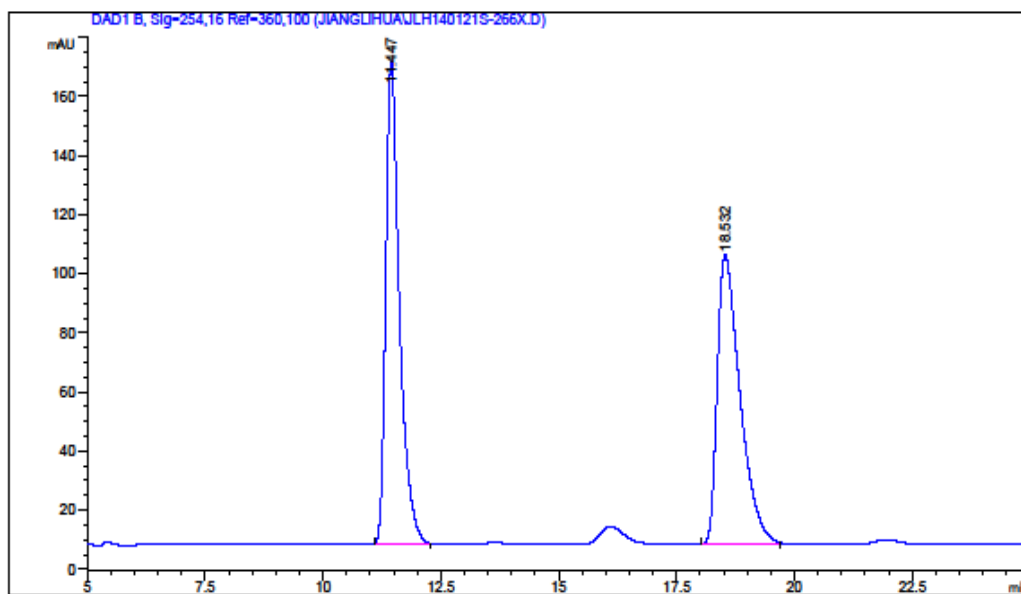

#### 面积百分比报告

```
=====
排序           :      信号
乘积因子       :      1.0000
稀释因子       :      1.0000
内标使用乘积因子和稀释因子
=====
```

信号 1: DAD1 B, Sig=254,16 Ref=360,100

| 峰 # | 保留时间 [min] | 类型 | 峰宽 [min] | 峰面积 [mAU*s] | 峰高 [mAU]  | 峰面积 %   |
|-----|------------|----|----------|-------------|-----------|---------|
| 1   | 11.447     | BB | 0.3029   | 3320.23804  | 163.53928 | 50.2168 |
| 2   | 18.532     | BB | 0.5092   | 3291.56543  | 97.67304  | 49.7832 |

总量 : 6611.80347 261.21232

\*\*\* 报告结束 \*\*\*

数据文件: D:\CHEMSTATION DATA\JIANGLIHUA\JLH140121S-266.D  
 样品名称: JLH140121S-266

```
=====
操作者       : jlh
仪器         : 仪器 1                      位置 : 样品瓶 1
进样日期     : 2014-1-21 13:37:34
采集方法     : C:\CHEM32\1\METHODS\JLH2013.M
最后修改     : 2014-1-21 13:36:05 : jlh
              (调用后修改)
分析方法     : C:\CHEM32\1\METHODS\DEF_LC.M
最后修改     : 2014-3-26 10:20:12 : ///////////////
              (调用后修改)
样品信息     : AD-H, hex :ipr =80:20, 0.8mL/min,45bar,10uL
=====
```

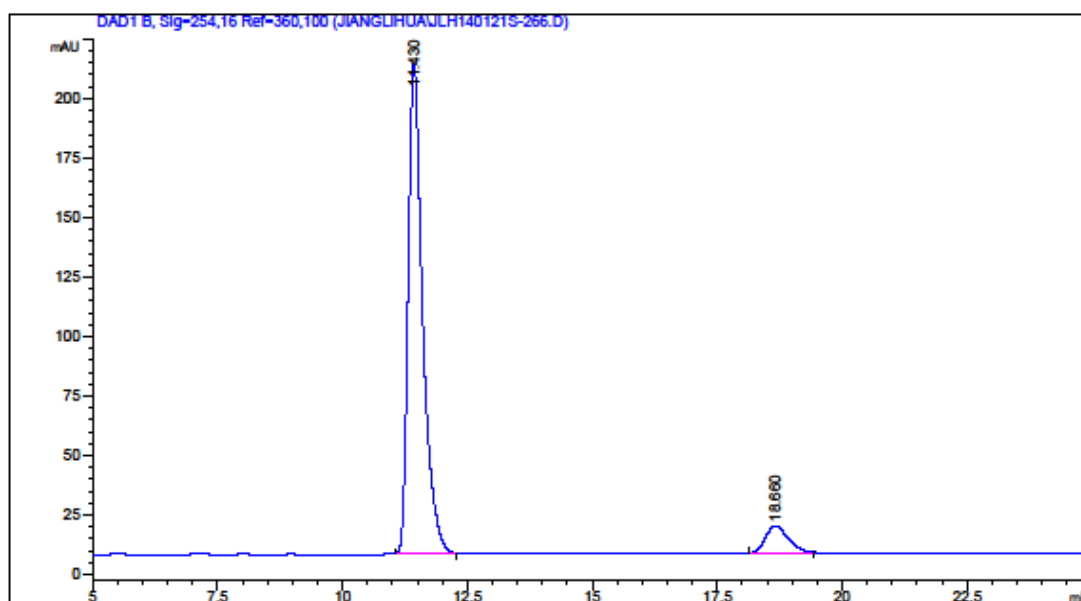

#### 面积百分比报告

```
=====
排序         : 信号
乘积因子:    : 1.0000
稀释因子:    : 1.0000
内标使用乘积因子和稀释因子
=====
```

信号 1: DAD1 B, Sig=254,16 Ref=360,100

| 峰 #  | 保留时间 [min] | 类型 | 峰宽 [min] | 峰面积 [mAU*s] | 峰高 [mAU]  | 峰面积 %   |
|------|------------|----|----------|-------------|-----------|---------|
| 1    | 11.430     | BB | 0.2983   | 4139.51221  | 206.13531 | 92.1182 |
| 2    | 18.660     | BB | 0.4619   | 354.17767   | 11.41856  | 7.8817  |
| 总量 : |            |    |          | 4493.68988  | 217.55388 |         |

\*\*\* 报告结束 \*\*\*

仪器 1 2014-3-26 10:23:00 //////////////////////////////////

页 1/1

HPLC spectra of compound **4f** (racemic and chiral product):

数据文件: D:\CHEMSTATION DATA\JIANGLIHUA\JLH140303S-281X.D  
 样品名称: JLH140303S-281X

```
=====
操作者       : jianglihua
仪器         : 仪器 1                      位置 : 样品瓶 1
进样日期     : 2014-3-2 14:06:18
采集方法     : C:\CHEM32\1\METHODS\JLH2013.M
最后修改     : 2014-3-2 13:29:52 : jianglihua
              (调用后修改)
分析方法     : C:\CHEM32\1\METHODS\DEF_LC.M
最后修改     : 2014-3-26 10:05:23 : ///////////////
              (调用后修改)
样品信息     : AD-H hex :2-Pro =80:20, 0.8mL/min, 47bar
=====
```

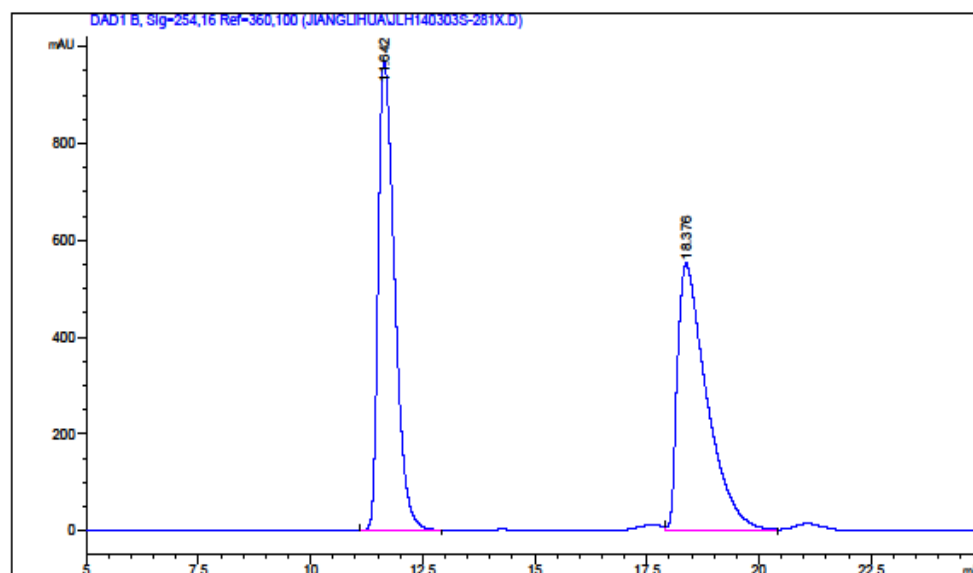

#### 面积百分比报告

```
=====
排序           :      信号
乘积因子       :      1.0000
稀释因子       :      1.0000
内标使用乘积因子和稀释因子
=====
```

信号 1: DAD1 B, Sig=254,16 Ref=360,100

| 峰 # | 保留时间 [min] | 类型 | 峰宽 [min] | 峰面积 [mAU*s] | 峰高 [mAU]  | 峰面积 %   |
|-----|------------|----|----------|-------------|-----------|---------|
| 1   | 11.642     | BB | 0.4007   | 2.47092e4   | 971.60718 | 49.5765 |
| 2   | 18.376     | VB | 0.6791   | 2.51313e4   | 552.03339 | 50.4235 |

总量 : 4.98405e4 1523.64056

\*\*\* 报告结束 \*\*\*

数据文件: D:\CHEMSTATION DATA\JIANGLIHUA\JLH140303S-281.D  
 样品名称: JLH140303S-281

```
=====
操作者       : jianglihua
仪器         : 仪器 1                      位置 : 样品瓶 1
进样日期     : 2014-3-3 14:42:52
采集方法     : C:\CHEM32\1\METHODS\JLH2013.M
最后修改     : 2014-3-3 14:41:47 : jianglihua
              (调用后修改)
分析方法     : C:\CHEM32\1\METHODS\DEF.LC.M
最后修改     : 2014-3-26 10:05:23 : ///////////////
              (调用后修改)
样品信息     : AD-H hex :2-Pro =80:20, 0.8mL/min, 47bar
=====
```

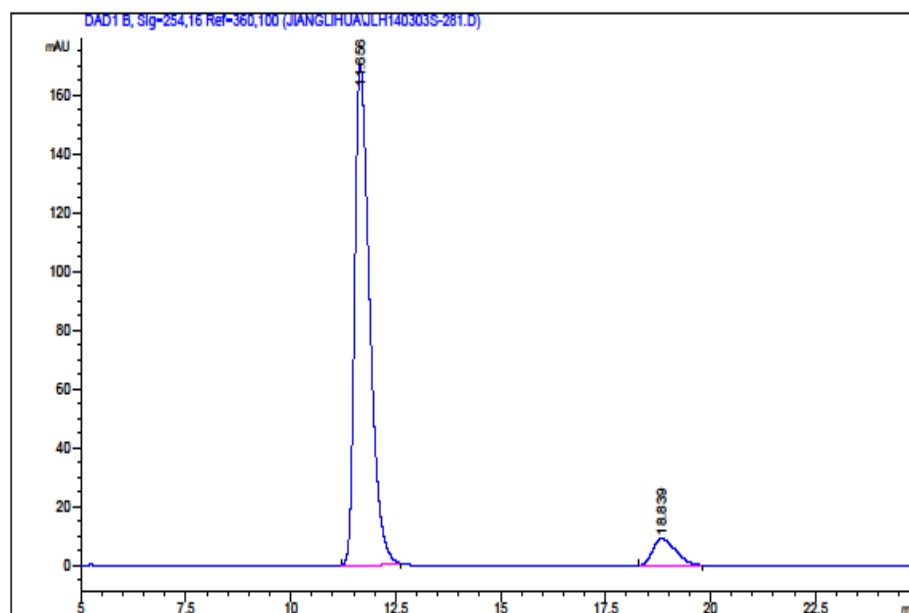

#### 面积百分比报告

```
=====
排序           : 信号
乘积因子:      : 1.0000
稀释因子:      : 1.0000
内标使用乘积因子和稀释因子
=====
```

信号 1: DAD1 B, Sig=254,16 Ref=360,100

| 峰 # | 保留时间 [min] | 类型 | 峰宽 [min] | 峰面积 [mAU*s] | 峰高 [mAU]  | 峰面积 %   |
|-----|------------|----|----------|-------------|-----------|---------|
| 1   | 11.656     | BB | 0.3847   | 4222.52002  | 170.64259 | 92.3477 |
| 2   | 18.839     | BB | 0.5865   | 349.89618   | 9.10089   | 7.6523  |

总量 : 4572.41620 179.74348

\*\*\* 报告结束 \*\*\*

仪器 1 2014-3-26 10:08:57 ///////////////

页 1/1

HPLC spectra of compound **4g** (racemic and chiral product):

数据文件: D:\CHEMSTATION DATA\JIANGLIHUA\JLH140306S-284X.D  
 样品名称: JLH140306S-284X

```

=====
操作者       : JLH
仪器         : 仪器 1                      位置 : 样品瓶 1
进样日期     : 2014-3-6 16:25:24
采集方法     : C:\CHEM32\1\METHODS\JLH2013.M
最后修改     : 2014-3-6 15:25:38 : huanggongbin
              (调用后修改)
分析方法     : C:\CHEM32\1\METHODS\DEF_LC.M
最后修改     : 2014-3-26 10:00:25 : ///////////////
              (调用后修改)
样品信息     : AD-H hex :2-Pro =80:20, 0.8mL/min, 48bar
=====
  
```

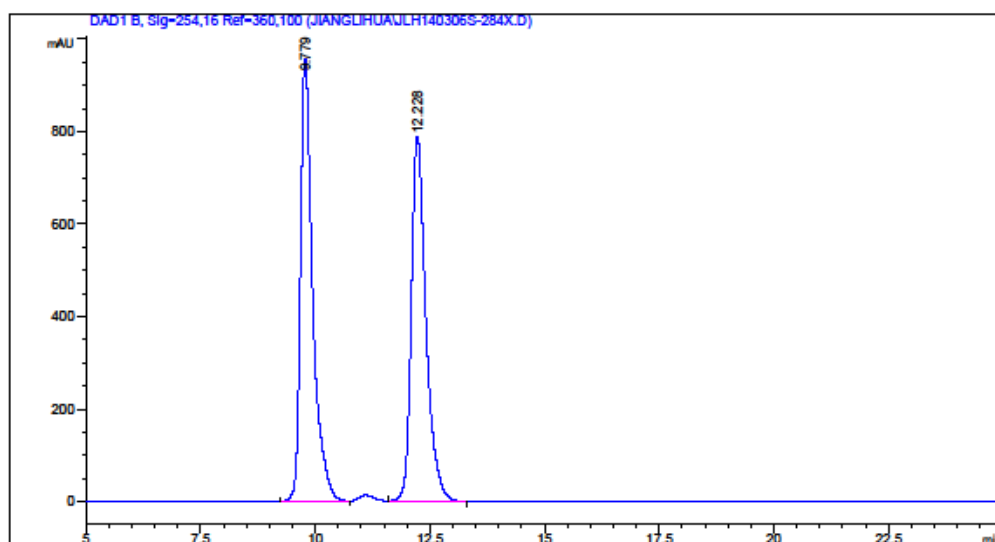

=====  
 面积百分比报告  
 =====

```

排序           :      信号
乘积因子:      :      1.0000
稀释因子:      :      1.0000
内标使用乘积因子和稀释因子
  
```

信号 1: DAD1 B, Sig=254,16 Ref=360,100

| 峰 # | 保留时间 [min] | 类型 | 峰宽 [min] | 峰面积 [mAU*s] | 峰高 [mAU]  | 峰面积 %   |
|-----|------------|----|----------|-------------|-----------|---------|
| 1   | 9.779      | BB | 0.2749   | 1.78128e4   | 957.99664 | 50.4346 |
| 2   | 12.228     | VB | 0.3325   | 1.75058e4   | 790.03217 | 49.5654 |

总量 : 3.53186e4 1748.02881

=====  
 \*\*\* 报告结束 \*\*\*  
 =====

数据文件: D:\CHEMSTATION DATA\JIANGLIHUA\JLH140306S-284.D  
 样品名称: JLH140306S-284

```
=====
操作者       : JLH
仪器         : 仪器 1                      位置 : 样品瓶 1
进样日期     : 2014-3-6 17:08:31
采集方法     : C:\CHEM32\1\METHODS\JLH2013.M
最后修改     : 2014-3-6 17:06:20 : JLH
              (调用后修改)
分析方法     : C:\CHEM32\1\METHODS\DEF_LC.M
最后修改     : 2014-3-26 10:00:25 : ///////////////
              (调用后修改)
样品信息     : AD-H hex :2-Pro =80:20, 0.8mL/min, 48bar
=====
```

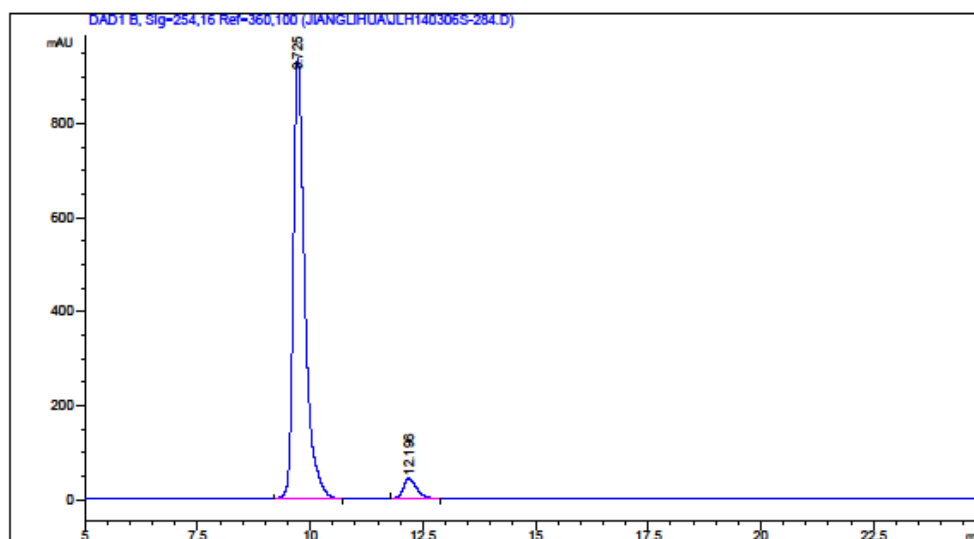

#### 面积百分比报告

```
=====
排序           :      信号
乘积因子:      :      1.0000
稀释因子:      :      1.0000
内标使用乘积因子和稀释因子
=====
```

信号 1: DAD1 B, Sig=254,16 Ref=360,100

| 峰 # | 保留时间 [min] | 类型 | 峰宽 [min] | 峰面积 [mAU*s] | 峰高 [mAU]  | 峰面积 %   |
|-----|------------|----|----------|-------------|-----------|---------|
| 1   | 9.725      | BB | 0.2668   | 1.66305e4   | 938.39343 | 94.8766 |
| 2   | 12.196     | BB | 0.3173   | 898.06165   | 43.05593  | 5.1234  |

总量 : 1.75285e4 981.44936

\*\*\* 报告结束 \*\*\*

仪器 1 2014-3-26 10:01:29 ///////////////

页 1/1

HPLC spectra of compound **4h** (racemic and chiral product):

数据文件: D:\CHEMSTATION DATA\JIANGLIHUA\JLH140316S-295X-1.D  
 样品名称: JLH140316S-295X-1

```
=====
操作者       : jlh                               位置 : 样品瓶 1
进样日期     : 16-Mar-14, 15:57:48
采集方法     : JLH2013.M
分析方法     : C:\CHEM32\1\METHODS\DEF_IC.M
最后修改     : 2014-3-26 9:28:41 : ////////////////
              (调用后修改)
样品信息     : IA hex :2-Pro=90:10, 1mL/min, 45bar
=====
```

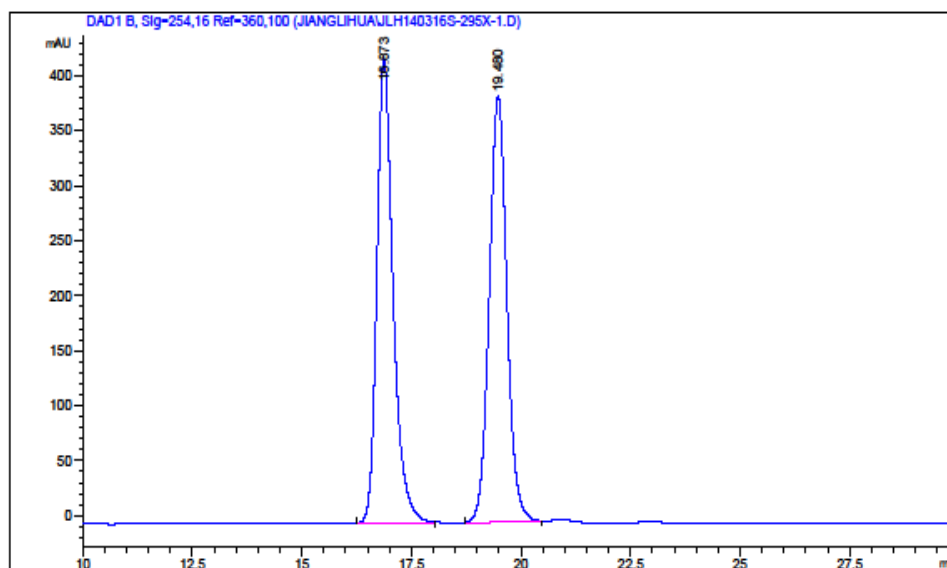

#### 面积百分比报告

```
=====
排序           :      信号
乘积因子:      :      1.0000
稀释因子:      :      1.0000
内标使用乘积因子和稀释因子
=====
```

信号 1: DAD1 B, Sig=254,16 Ref=360,100

| 峰 # | 保留时间 [min] | 类型 | 峰宽 [min] | 峰面积 [mAU*s] | 峰高 [mAU]  | 峰面积 %   |
|-----|------------|----|----------|-------------|-----------|---------|
| 1   | 16.873     | BB | 0.3894   | 1.08964e4   | 421.73956 | 50.1623 |
| 2   | 19.480     | BB | 0.4301   | 1.08259e4   | 387.28638 | 49.8377 |

总量 : 2.17224e4 809.02594

\*\*\* 报告结束 \*\*\*



数据文件: D:\CHEMSTATION DATA\JIANGLIHUA\JLH140316S-295-1.D  
 样品名称: JLH140316S-295-1

```
=====
操作者       : jlh                               位置 : 样品瓶 1
进样日期     : 16-Mar-14, 16:59:01
采集方法     : JLH2013.M
分析方法     : C:\CHEM32\1\METHODS\DEF_LC.M
最后修改     : 2014-3-26 9:28:41 : ///////////////
              (调用后修改)
样品信息     : IA hex :2-Pro=90:10, 1mL/min, 45bar
=====
```

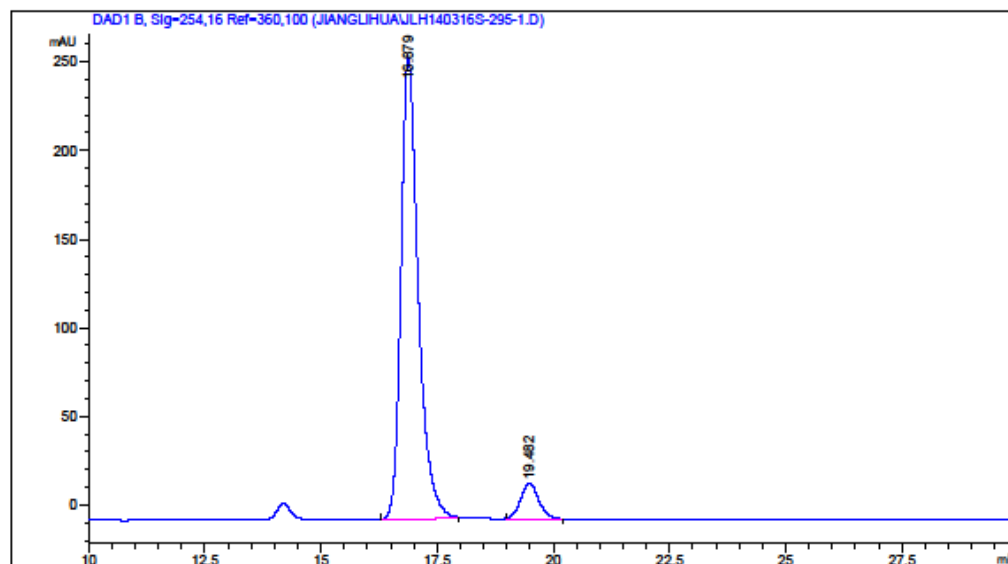

#### 面积百分比报告

```
=====
排序           :      信号
乘积因子       :      1.0000
稀释因子       :      1.0000
内标使用乘积因子和稀释因子
=====
```

信号 1: DAD1 B, Sig=254,16 Ref=360,100

| 峰 # | 保留时间 [min] | 类型 | 峰宽 [min] | 峰面积 [mAU*s] | 峰高 [mAU]  | 峰面积 %   |
|-----|------------|----|----------|-------------|-----------|---------|
| 1   | 16.879     | BB | 0.3905   | 6748.15430  | 260.21652 | 92.3559 |
| 2   | 19.482     | BB | 0.4134   | 558.53259   | 20.40183  | 7.6441  |

总量 : 7306.68689 280.61835

\*\*\* 报告结束 \*\*\*

仪器 1 2014-3-26 9:37:26 ///////////////

页 1/1

HPLC spectra of compound **4i** (racemic and chiral product):

数据文件: D:\CHEMSTATION DATA\JIANGLIHUA\JLH140318S-294X.D  
 样品名称: JLH140318S-294X

```
=====
操作者       : jlh                               位置 : 样品瓶 1
进样日期     : 18-Mar-14, 15:24:28
采集方法     : JLH2013.M
分析方法     : C:\CHEM32\1\METHODS\DEF_LC.M
最后修改     : 2014-3-26 9:40:49 : ///////////////
              (调用后修改)
样品信息     : IA hex :2-Pro=90:10,1mL/min, 45bar
=====
```

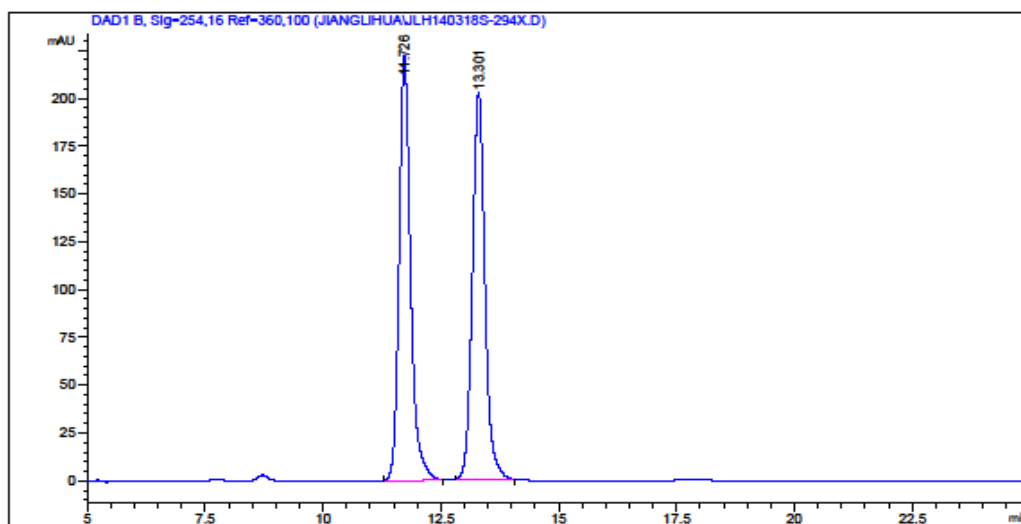

=====  
 面积百分比报告  
 =====

```
排序           :      信号
乘积因子:      :      1.0000
稀释因子:      :      1.0000
内标使用乘积因子和稀释因子
```

信号 1: DAD1 B, Sig=254,16 Ref=360,100

| 峰 # | 保留时间 [min] | 类型 | 峰宽 [min] | 峰面积 [mAU*s] | 峰高 [mAU]  | 峰面积 %   |
|-----|------------|----|----------|-------------|-----------|---------|
| 1   | 11.726     | BB | 0.2571   | 3793.54126  | 222.24809 | 50.2071 |
| 2   | 13.301     | BB | 0.2829   | 3762.24487  | 202.39081 | 49.7929 |

总量 : 7555.78613 424.63890

=====  
 \*\*\* 报告结束 \*\*\*  
 =====

数据文件: D:\CHEMSTATION DATA\JIANGLIHUA\JLH140318S-294.D  
 样品名称: JLH140318S-294

```
=====
操作者       : jlh                               位置 : 样品瓶 1
进样日期     : 18-Mar-14, 15:56:47
采集方法     : JLH2013.M
分析方法     : C:\CHEM32\1\METHODS\DEF_LC.M
最后修改     : 2014-3-26 9:40:49 : ///////////////
              (调用后修改)
样品信息     : IA hex :2-Pro=90:10,1mL/min, 45bar
=====
```

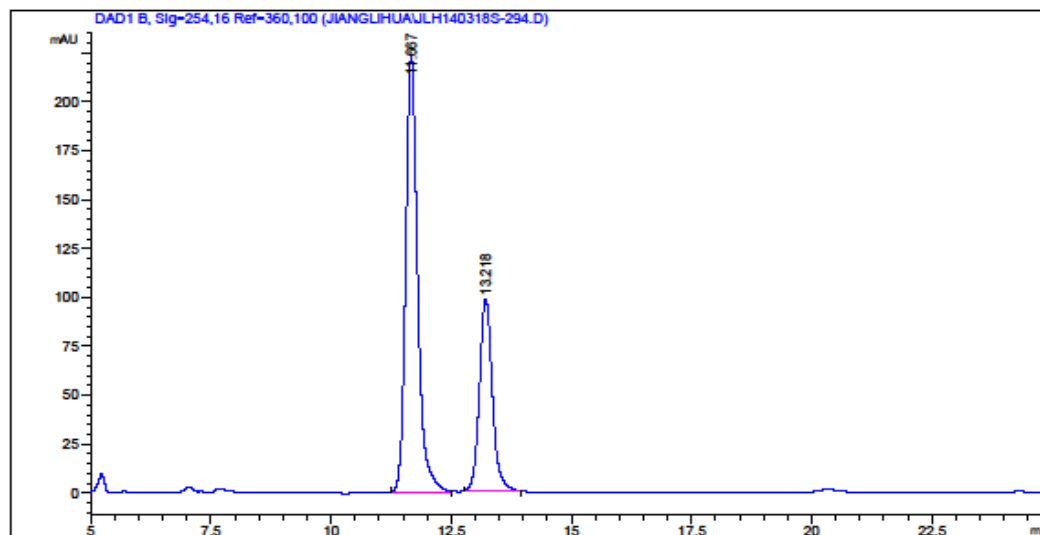

#### 面积百分比报告

```
=====
排序           : 信号
乘积因子       :      1.0000
稀释因子       :      1.0000
内标使用乘积因子和稀释因子
=====
```

信号 1: DAD1 B, Sig=254,16 Ref=360,100

| 峰 # | 保留时间 [min] | 类型 | 峰宽 [min] | 峰面积 [mAU*s] | 峰高 [mAU]  | 峰面积 %   |
|-----|------------|----|----------|-------------|-----------|---------|
| 1   | 11.667     | BB | 0.2605   | 3843.20874  | 223.57930 | 67.4515 |
| 2   | 13.218     | BB | 0.2854   | 1854.53101  | 98.61263  | 32.5485 |

总量 : 5697.73975 322.19193

\*\*\* 报告结束 \*\*\*

仪器 1 2014-3-26 9:40:51 ///////////////

页 1/1

HPLC spectra of compound **4j** (racemic and chiral product):

数据文件: D:\CHEMSTATION DATA\JIANGLIHUA\JLH140228S-269X.D  
 样品名称: JLH140228S-269X

```

=====
操作者       : jianglihua
仪器         : 仪器 1                      位置 : 样品瓶 1
进样日期     : 2014-2-28 12:37:19
采集方法     : C:\CHEM32\1\METHODS\JLH2013.M
最后修改     : 2014-2-28 12:35:11 : jianglihua
              (调用后修改)
分析方法     : C:\CHEM32\1\METHODS\DEF_LC.M
最后修改     : 2014-3-26 10:20:12 : ////////////////
              (调用后修改)
样品信息     : AD-H hex :I-PRO =80:20, 0.8mL/min, 47bar
=====
  
```

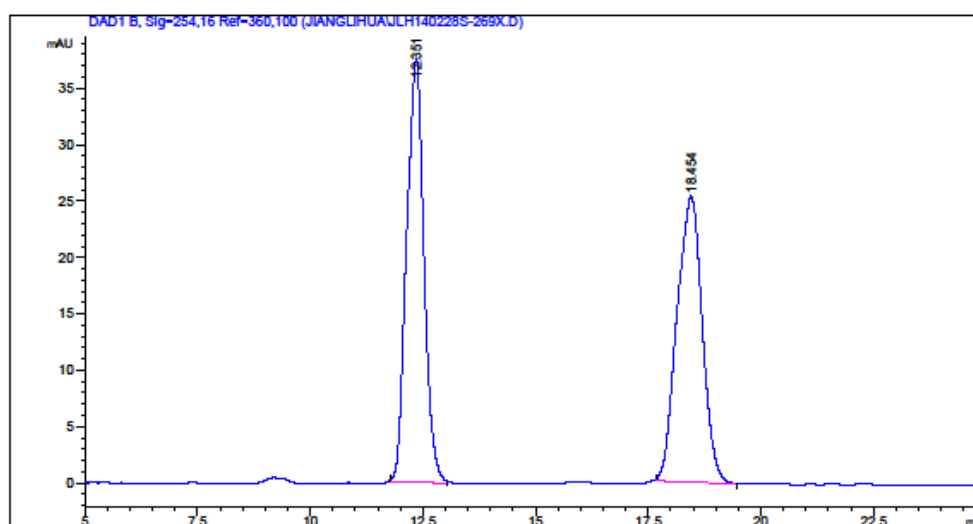

#### 面积百分比报告

```

=====
排序           :      信号
乘积因子:      :      1.0000
稀释因子:      :      1.0000
内标使用乘积因子和稀释因子
  
```

信号 1: DAD1 B, Sig=254,16 Ref=360,100

| 峰 #  | 保留时间 [min] | 类型 | 峰宽 [min] | 峰面积 [mAU*s] | 峰高 [mAU] | 峰面积 %   |
|------|------------|----|----------|-------------|----------|---------|
| 1    | 12.351     | BB | 0.3789   | 1002.62195  | 37.62417 | 50.3773 |
| 2    | 18.454     | BB | 0.5646   | 987.60516   | 25.34249 | 49.6227 |
| 总量 : |            |    |          | 1990.22711  | 62.96766 |         |

\*\*\* 报告结束 \*\*\*

仪器 1 2014-3-26 10:20:43 ////////////////

页 1/1

数据文件: D:\CHEMSTATION DATA\JIANGLIHUA\JLH140228S-269-1.D  
 样品名称: JLH140228S-269-1

```

=====
操作者       : jianglihua
仪器         : 仪器 1                      位置 : 样品瓶 1
进样日期     : 2014-2-28 12:09:16
采集方法     : C:\CHEM32\1\METHODS\JLH2013.M
最后修改     : 2014-2-28 12:05:32 : jianglihua
              (调用后修改)
分析方法     : C:\CHEM32\1\METHODS\DEF_LC.M
最后修改     : 2014-3-26 10:20:12 : ///////////////
              (调用后修改)
样品信息     : AD-H hex :I-PRO =80:20, 0.8mL/min, 47bar
=====
  
```

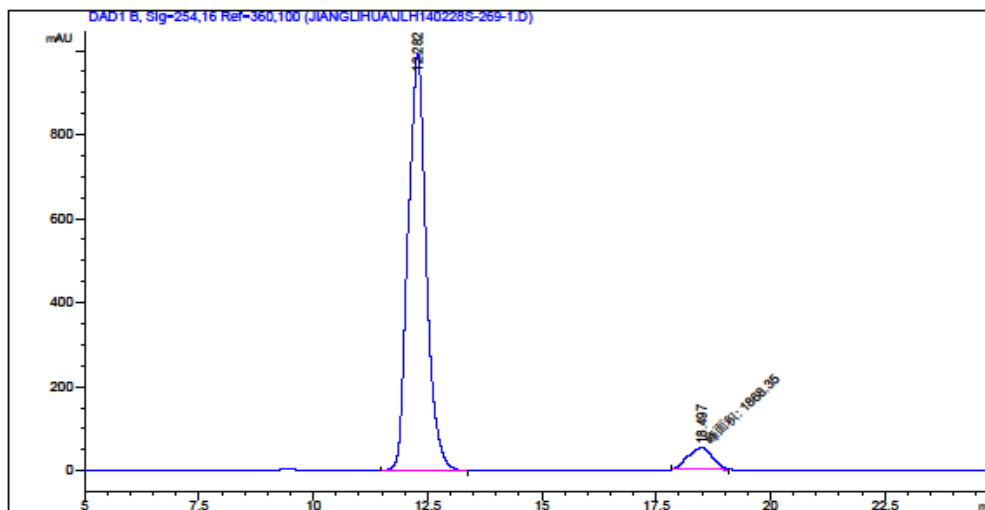

#### 面积百分比报告

```

=====
排序       :      信号
乘积因子:      :      1.0000
稀释因子:      :      1.0000
内标使用乘积因子和稀释因子
=====
  
```

信号 1: DAD1 B, Sig=254,16 Ref=360,100

| 峰 # | 保留时间 [min] | 类型 | 峰宽 [min] | 峰面积 [mAU*s] | 峰高 [mAU]  | 峰面积 %   |
|-----|------------|----|----------|-------------|-----------|---------|
| 1   | 12.282     | BB | 0.3911   | 2.73939e4   | 995.28674 | 93.6152 |
| 2   | 18.497     | MM | 0.6023   | 1868.35120  | 51.69815  | 6.3848  |

总量 : 2.92623e4 1046.98489

\*\*\* 报告结束 \*\*\*

仪器 1 2014-3-26 10:20:17 ///////////////

页 1/1

HPLC spectra of compound **4k** (racemic and chiral product):

数据文件: D:\CHEMSTATION DATA\JIANGLIHUA\JLH140122S-270X.D  
 样品名称: JLH140122S-270X

```

=====
操作者       : jlh                      位置 : 样品瓶 1
仪器         : 仪器 1
进样日期     : 2014-1-22 12:36:26
采集方法     : C:\CHEM32\1\METHODS\JLH2013.M
最后修改     : 2014-1-22 12:34:44 : jlh
               (调用后修改)
分析方法     : C:\CHEM32\1\METHODS\DEF.LC.M
最后修改     : 2014-3-26 10:15:54 : ///////////////
               (调用后修改)
样品信息     : AD-H, hex :ipr =80:20, 0.8mL/min, 47bar, 5uL
=====
  
```

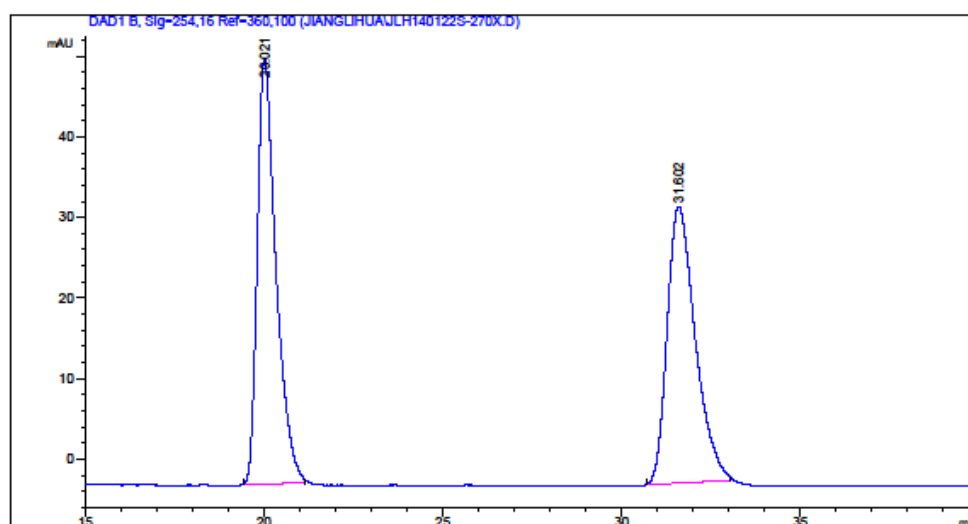

#### 面积百分比报告

```

=====
排序           :      信号
乘积因子:      :      1.0000
稀释因子:      :      1.0000
内标使用乘积因子和稀释因子
=====
  
```

信号 1: DAD1 B, Sig=254,16 Ref=360,100

| 峰 #  | 保留时间 [min] | 类型 | 峰宽 [min] | 峰面积 [mAU*s] | 峰高 [mAU] | 峰面积 %   |
|------|------------|----|----------|-------------|----------|---------|
| 1    | 20.021     | BB | 0.5371   | 1917.41284  | 52.87342 | 50.5914 |
| 2    | 31.602     | BB | 0.8206   | 1872.58215  | 34.31936 | 49.4086 |
| 总量 : |            |    |          | 3789.99500  | 87.19278 |         |

\*\*\* 报告结束 \*\*\*

仪器 1 2014-3-26 10:16:04 ///////////////

页 1/1

数据文件: D:\CHEMSTATION DATA\JIANGLIHUA\JLH140122S-270.D  
 样品名称: JLH140122S-270

```
=====
操作者       : jlh
仪器         : 仪器 1                      位置 : 样品瓶 1
进样日期     : 2014-1-22 13:25:15
采集方法     : C:\CHEM32\1\METHODS\JLH2013.M
最后修改     : 2014-1-22 13:23:07 : jlh
              (调用后修改)
分析方法     : C:\CHEM32\1\METHODS\DEF_LC.M
最后修改     : 2014-3-26 10:15:54 : ///////////////
              (调用后修改)
样品信息     : AD-H, hex :ipr ≈80:20, 0.8mL/min, 47bar, 10uL
=====
```

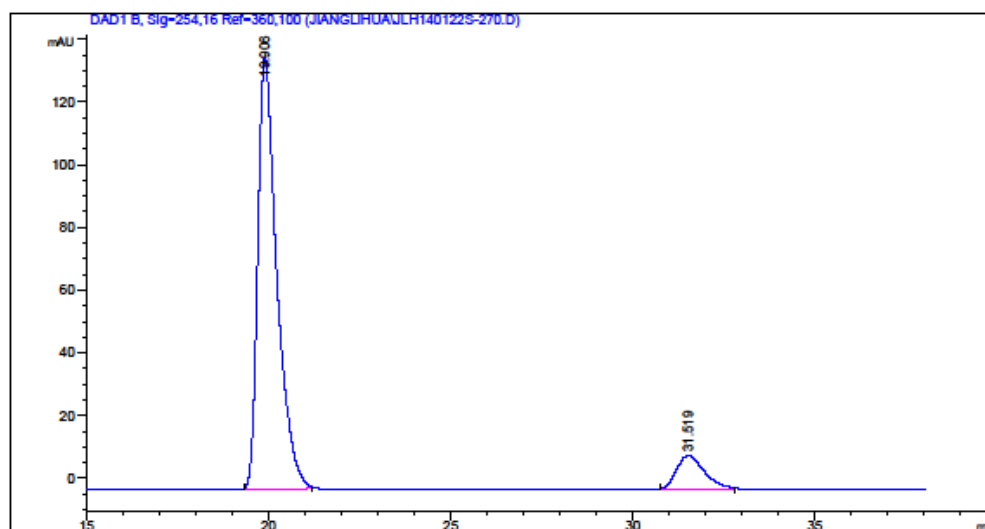

#### 面积百分比报告

```
=====
排序           :      信号
乘积因子       :      1.0000
稀释因子       :      1.0000
内标使用乘积因子和稀释因子
=====
```

信号 1: DAD1 B, Sig=254,16 Ref=360,100

| 峰 # | 保留时间 [min] | 类型 | 峰宽 [min] | 峰面积 [mAU*s] | 峰高 [mAU]  | 峰面积 %   |
|-----|------------|----|----------|-------------|-----------|---------|
| 1   | 19.906     | BB | 0.5357   | 4980.04492  | 127.76144 | 89.9614 |
| 2   | 31.519     | BB | 0.7631   | 555.71527   | 10.60972  | 10.0386 |

总量 : 5535.76019 148.37116

\*\*\* 报告结束 \*\*\*

仪器 1 2014-3-26 10:16:59 ///////////////

页 1/1

HPLC spectra of compound **4l** (racemic and chiral product):

数据文件: D:\CHEMSTATION DATA\JIANGLIHUA\JLH140228S-279X.D  
 样品名称: JLH140228S-279X

```

=====
操作者       : jianglihua
仪器         : 仪器 1                      位置 : 样品瓶 1
进样日期     : 2014-2-28 14:45:52
采集方法     : C:\CHEM32\1\METHODS\JLH2013.M
最后修改     : 2014-2-28 14:43:06 : jianglihua
              (调用后修改)
分析方法     : C:\CHEM32\1\METHODS\DEF_LC.M
最后修改     : 2014-3-26 10:13:30 : ///////////////
              (调用后修改)
样品信息     : AD-H hex :I-PRO =80:20, 0.8mL/min, 47bar
=====
  
```

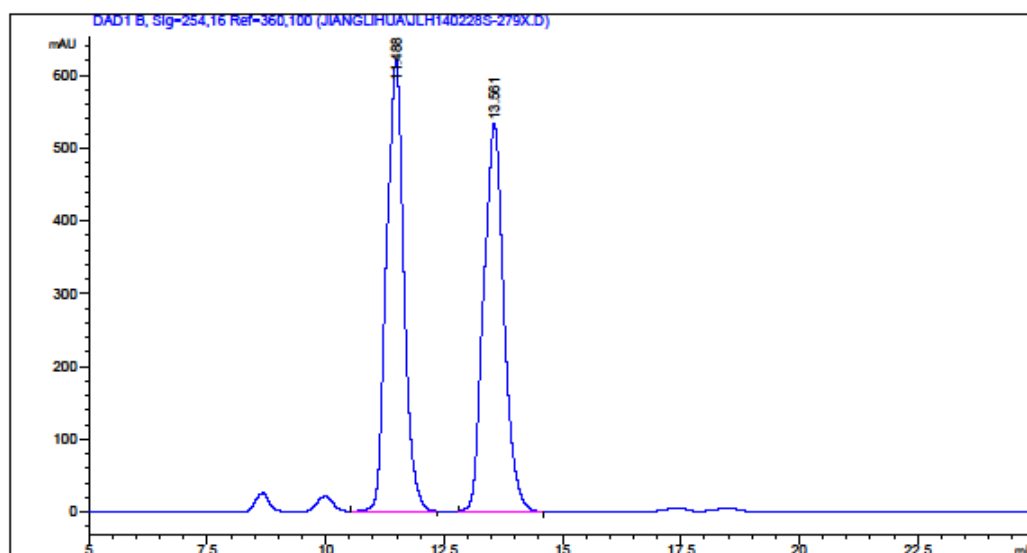

#### 面积百分比报告

```

=====
排序           :      信号
乘积因子       :      1.0000
稀释因子       :      1.0000
内标使用乘积因子和稀释因子
=====
  
```

信号 1: DAD1 B, Sig=254,16 Ref=360,100

| 峰 # | 保留时间 [min] | 类型 | 峰宽 [min] | 峰面积 [mAU*s] | 峰高 [mAU]  | 峰面积 %   |
|-----|------------|----|----------|-------------|-----------|---------|
| 1   | 11.488     | VB | 0.3612   | 1.58279e4   | 621.31628 | 50.0079 |
| 2   | 13.561     | BB | 0.4239   | 1.58229e4   | 533.71057 | 49.9921 |

总量 : 3.16507e4 1155.02686

\*\*\* 报告结束 \*\*\*



数据文件: D:\CHEMSTATION DATA\JIANGLIHUA\JLH140228S-279.D  
 样品名称: JLH140228S-279

```
=====
操作者       : jianglihua
仪器         : 仪器 1                      位置 : 样品瓶 1
进样日期     : 2014-2-28 15:21:57
采集方法     : C:\CHEM32\1\METHODS\JLH2013.M
最后修改     : 2014-2-28 15:19:24 : jianglihua
              (调用后修改)
分析方法     : C:\CHEM32\1\METHODS\DEF_LC.M
最后修改     : 2014-3-26 10:13:30 : ///////////////
              (调用后修改)
样品信息     : AD-H hex :I-PRO =80:20, 0.8mL/min, 47bar
=====
```

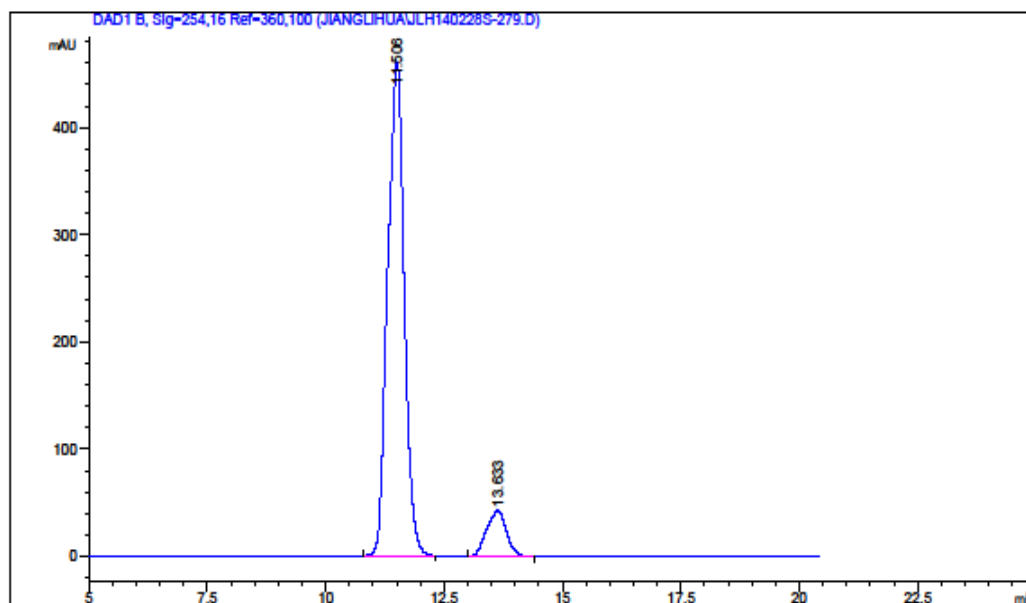

#### 面积百分比报告

```
=====
排序           :      信号
乘积因子       :      1.0000
稀释因子       :      1.0000
内标使用乘积因子和稀释因子
=====
```

信号 1: DAD1 B, Sig=254,16 Ref=360,100

| 峰 # | 保留时间 [min] | 类型 | 峰宽 [min] | 峰面积 [mAU*s] | 峰高 [mAU]  | 峰面积 %   |
|-----|------------|----|----------|-------------|-----------|---------|
| 1   | 11.506     | BB | 0.3460   | 1.12225e4   | 461.09793 | 90.1208 |
| 2   | 13.633     | BB | 0.4099   | 1230.22180  | 42.98919  | 9.8792  |

总量 : 1.24527e4 504.08712

\*\*\* 报告结束 \*\*\*

仪器 1 2014-3-26 10:14:31 ///////////////

页 1/1

HPLC spectra of compound **4m** (racemic and chiral product):

数据文件: D:\CHEMSTATION DATA\JIANGLIHUA\JLH140228S-280X.D  
 样品名称: JLH140228S-280X

```

=====
操作者       : jianglihua
仪器         : 仪器 1                      位置 : 样品瓶 1
进样日期     : 2014-2-28 19:16:16
采集方法     : C:\CHEM32\1\METHODS\JLH2013.M
最后修改     : 2014-2-28 15:42:52 : jianglihua
              (调用后修改)
分析方法     : C:\CHEM32\1\METHODS\DEF_LC.M
最后修改     : 2014-3-26 10:11:13 : ////////////////
              (调用后修改)
样品信息     : AD-H hex :I-PRO =80:20, 0.8mL/min, 47bar
=====
  
```

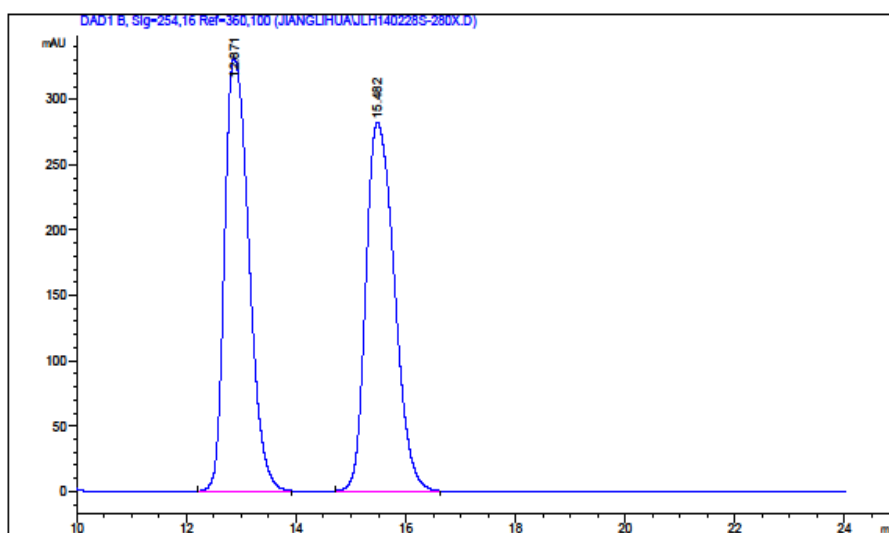

#### 面积百分比报告

```

=====
排序           : 信号
乘积因子       : 1.0000
稀释因子       : 1.0000
内标使用乘积因子和稀释因子
=====
  
```

信号 1: DAD1 B, Sig=254,16 Ref=360,100

| 峰 #  | 保留时间 [min] | 类型 | 峰宽 [min] | 峰面积 [mAU*s] | 峰高 [mAU]  | 峰面积 %   |
|------|------------|----|----------|-------------|-----------|---------|
| 1    | 12.871     | BB | 0.4883   | 1.01915e4   | 331.88306 | 50.0224 |
| 2    | 15.482     | BB | 0.5770   | 1.01624e4   | 282.14508 | 49.9776 |
| 总量 : |            |    |          | 2.03738e4   | 614.02814 |         |

\*\*\* 报告结束 \*\*\*

仪器 1 2014-3-26 10:11:18 ////////////////

页 1/1

数据文件: D:\CHEMSTATION DATA\JIANGLIHUA\JLH140228S-280.D  
 样品名称: JLH140228S-280

```
=====
操作者       : jianglihua
仪器         : 仪器 1                      位置 : 样品瓶 1
进样日期     : 2014-2-28 19:42:26
采集方法     : C:\CHEM32\1\METHODS\JLH2013.M
最后修改     : 2014-2-28 19:40:47 : jianglihua
              (调用后修改)
分析方法     : C:\CHEM32\1\METHODS\DEF_LC.M
最后修改     : 2014-3-26 10:11:13 : ///////////////
              (调用后修改)
样品信息     : AD-H hex :I-PRO =80:20, 0.8mL/min, 47bar
=====
```

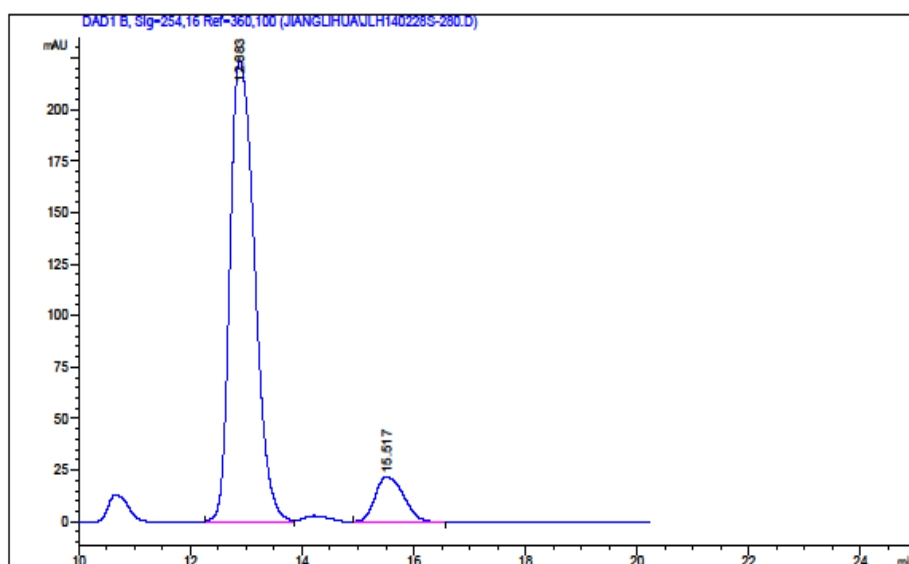

#### 面积百分比报告

```
=====
排序           :      信号
乘积因子:      :      1.0000
稀释因子:      :      1.0000
内标使用乘积因子和稀释因子
=====
```

信号 1: DAD1 B, Sig=254,16 Ref=360,100

| 峰 # | 保留时间 [min] | 类型 | 峰宽 [min] | 峰面积 [mAU*s] | 峰高 [mAU]  | 峰面积 %   |
|-----|------------|----|----------|-------------|-----------|---------|
| 1   | 12.883     | BB | 0.4894   | 6856.04639  | 223.80304 | 89.7125 |
| 2   | 15.517     | BB | 0.5712   | 786.19403   | 22.08955  | 10.2875 |

总量 : 7642.24042 245.89259

\*\*\* 报告结束 \*\*\*

仪器 1 2014-3-26 10:12:11 ///////////////

页 1/1

HPLC spectra of compound **4n** (racemic and chiral product):

数据文件: D:\CHEMSTATION DATA\JIANGLIHUA\JLH140303S-282X.D  
 样品名称: JLH140303S-282X

```

=====
操作者       : jianglihua
仪器         : 仪器 1                      位置 : 样品瓶 1
进样日期     : 2014-3-3 15:11:47
采集方法     : C:\CHEM32\1\METHODS\JLH2013.M
最后修改     : 2014-3-3 15:09:37 : jianglihua
              (调用后修改)
分析方法     : C:\CHEM32\1\METHODS\DEF_LC.M
最后修改     : 2014-3-26 10:05:23 : ////////////////
              (调用后修改)
样品信息     : AD-H hex :2-Pro =80:20, 0.8mL/min, 47bar
=====
  
```

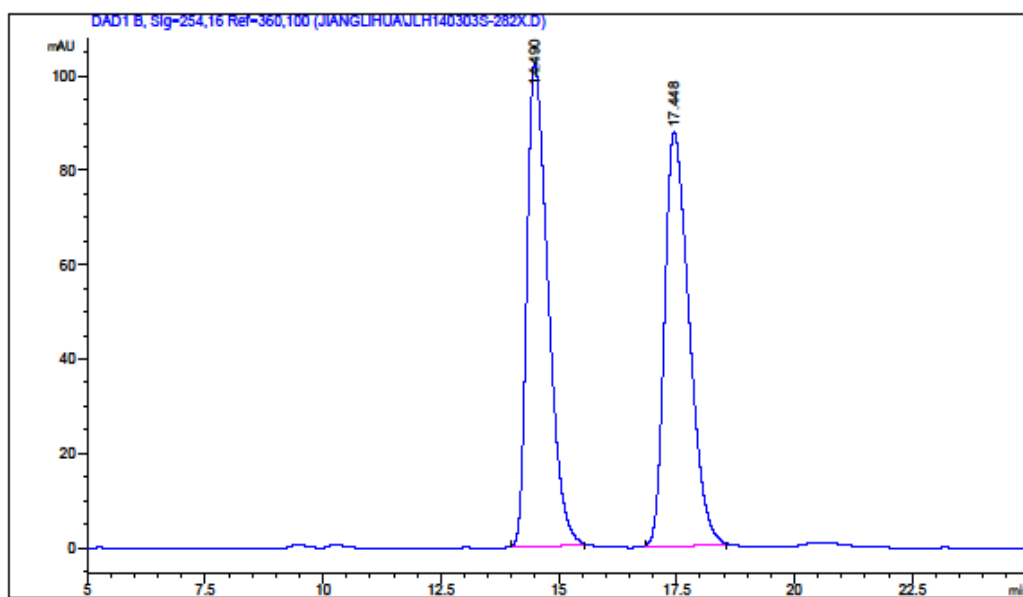

#### 面积百分比报告

```

=====
排序           :      信号
乘积因子       :      1.0000
稀释因子       :      1.0000
内标使用乘积因子和稀释因子
=====
  
```

信号 1: DAD1 B, Sig=254,16 Ref=360,100

| 峰 # | 保留时间 [min] | 类型 | 峰宽 [min] | 峰面积 [mAU*s] | 峰高 [mAU]  | 峰面积 %   |
|-----|------------|----|----------|-------------|-----------|---------|
| 1   | 14.490     | BB | 0.4880   | 3185.47852  | 102.65182 | 50.0685 |
| 2   | 17.448     | BB | 0.5691   | 3176.76733  | 88.00384  | 49.9315 |

总量 : 6362.24585 190.65565

\*\*\* 报告结束 \*\*\*

数据文件: D:\CHEMSTATION DATA\JIANGLIHUA\JLH140303S-282.D  
 样品名称: JLH140303S-282

```
=====
操作者       : jianglihua
仪器         : 仪器 1                      位置 : 样品瓶 1
进样日期     : 2014-3-3 15:39:38
采集方法     : C:\CHEM32\1\METHODS\JLH2013.M
最后修改     : 2014-3-3 15:37:22 : jianglihua
              (调用后修改)
分析方法     : C:\CHEM32\1\METHODS\DEF LC.M
最后修改     : 2014-3-26 10:05:23 : ///////////////////////////////////////////////////////////////////
              (调用后修改)
样品信息     : AD-H hex :2-Pro =80:20, 0.8mL/min, 47bar
=====
```

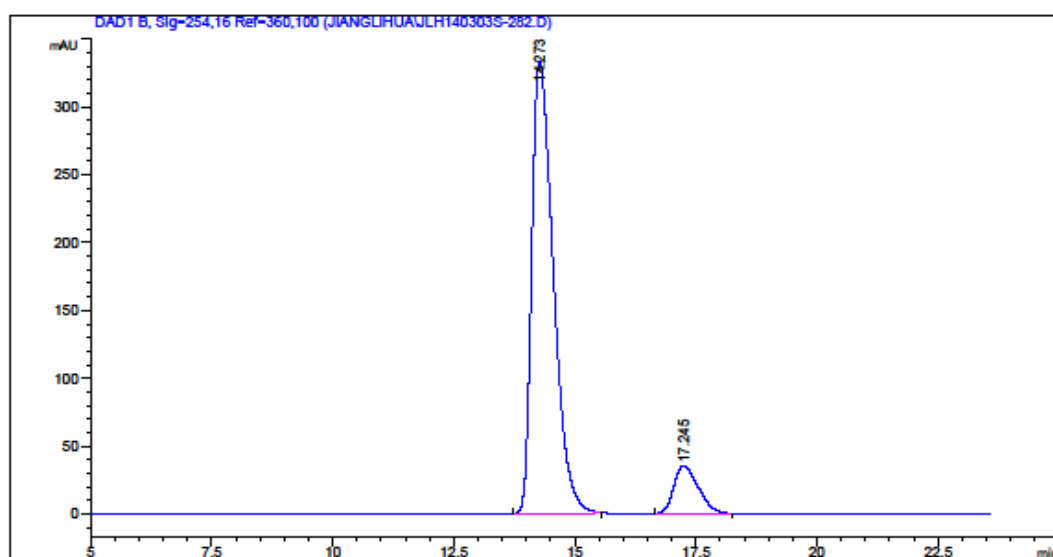

#### 面积百分比报告

```
=====
排序           :      信号
乘积因子       :      1.0000
稀释因子       :      1.0000
内标使用乘积因子和稀释因子
=====
```

信号 1: DAD1 B, Sig=254,16 Ref=360,100

| 峰 # | 保留时间 [min] | 类型 | 峰宽 [min] | 峰面积 [mAU*s] | 峰高 [mAU]  | 峰面积 %   |
|-----|------------|----|----------|-------------|-----------|---------|
| 1   | 14.273     | BB | 0.4840   | 1.02908e4   | 333.51309 | 89.2083 |
| 2   | 17.245     | BB | 0.5639   | 1244.89905  | 35.09257  | 10.7917 |

总量 : 1.15357e4 368.60566

\*\*\* 报告结束 \*\*\*

仪器 1 2014-3-26 10:06:41 //////////////////////////////////

页 1/1

HPLC spectra of compound **4o** (racemic and chiral product):

数据文件: D:\CHEMSTATION DATA\JIANGLIHUA\JLH140314S-292X-1.D  
 样品名称: JLH140314S-292X-1

```
=====
操作者       : jlh                               位置 : 样品瓶 1
进样日期     : 14-Mar-14, 18:26:41
采集方法     : JLH2013.M
分析方法     : C:\CHEM32\1\METHODS\DEF_LC.M
最后修改     : 2014-3-26 9:57:54 : ///////////////
              (调用后修改)
样品信息     : IA-H hex :2-Pro=90:10, 1mL/min, 54bar
=====
```

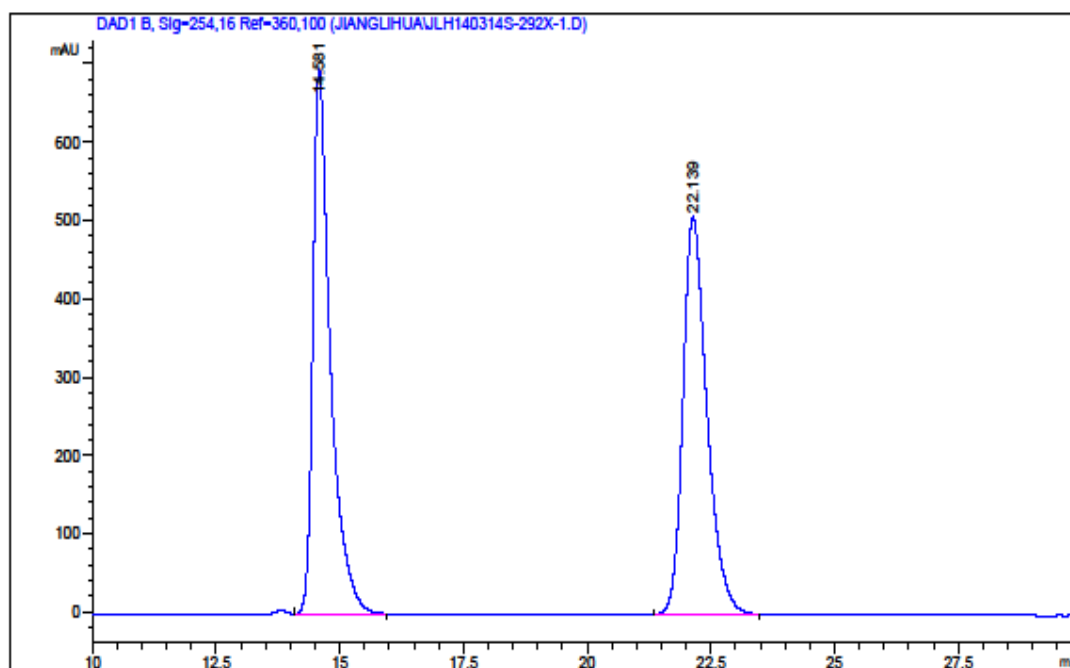

#### 面积百分比报告

```
=====
排序           :      信号
乘积因子       :      1.0000
稀释因子       :      1.0000
内标使用乘积因子和稀释因子
=====
```

信号 1: DAD1 B, Sig=254,16 Ref=360,100

| 峰 # | 保留时间 [min] | 类型 | 峰宽 [min] | 峰面积 [mAU*s] | 峰高 [mAU]  | 峰面积 %   |
|-----|------------|----|----------|-------------|-----------|---------|
| 1   | 14.581     | VB | 0.3599   | 1.71947e4   | 696.90269 | 50.0358 |
| 2   | 22.139     | BB | 0.5100   | 1.71701e4   | 508.38876 | 49.9642 |

总量 : 3.43648e4 1205.29245

\*\*\* 报告结束 \*\*\*

数据文件: D:\CHEMSTATION DATA\JIANGLIHUA\JLH140314S-292-1.D  
 样品名称: JLH140314S-292-1

```
=====
操作者       : jlh                               位置 : 样品瓶 1
进样日期     : 14-Mar-14, 19:03:09
采集方法     : JLH2013.M
分析方法     : C:\CHEM32\1\METHODS\DEF_LC.M
最后修改     : 2014-3-26 9:57:54 : ///////////////
              (调用后修改)
样品信息     : IA-H hex :2-Pro=90:10, 1mL/min, 54bar
=====
```

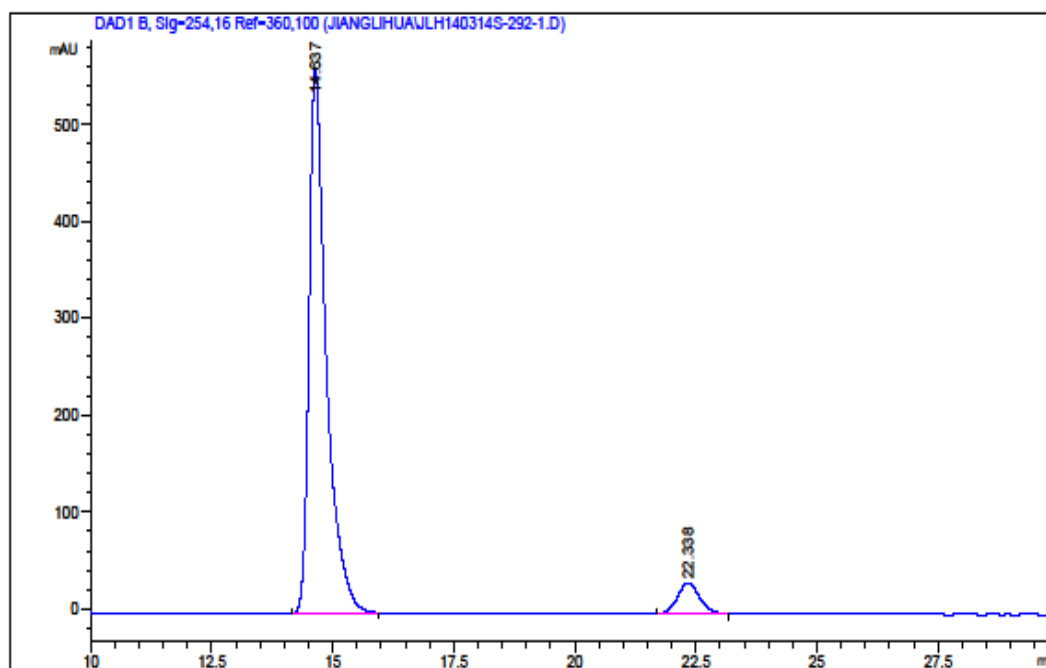

=====  
 面积百分比报告  
 =====

```
排序           :      信号
乘积因子       :      1.0000
稀释因子       :      1.0000
内标使用乘积因子和稀释因子
```

信号 1: DAD1 B, Sig=254,16 Ref=360,100

| 峰 # | 保留时间 [min] | 类型 | 峰宽 [min] | 峰面积 [mAU*s] | 峰高 [mAU]  | 峰面积 %   |
|-----|------------|----|----------|-------------|-----------|---------|
| 1   | 14.637     | BB | 0.3623   | 1.39110e4   | 562.96448 | 93.0769 |
| 2   | 22.338     | BB | 0.4929   | 1034.70703  | 31.86114  | 6.9231  |

总量 : 1.49457e4 594.82562

=====  
 \*\*\* 报告结束 \*\*\*  
 =====

数据文件: D:\CHEMSTATION DATA\JIANGLIHUA\JLH140316S-297X.D  
 样品名称: JLH140316S-297X

```
=====
操作者       : jlh                               位置 : 样品瓶 1
进样日期     : 16-Mar-14, 17:38:13
采集方法     : JLH2013.M
分析方法     : C:\CHEM32\1\METHODS\DEF_LC.M
最后修改     : 2014-3-26 9:28:41 : ///////////////
              (调用后修改)
样品信息     : IA hex :2-Pro=90:10, 1mL/min, 45bar
=====
```

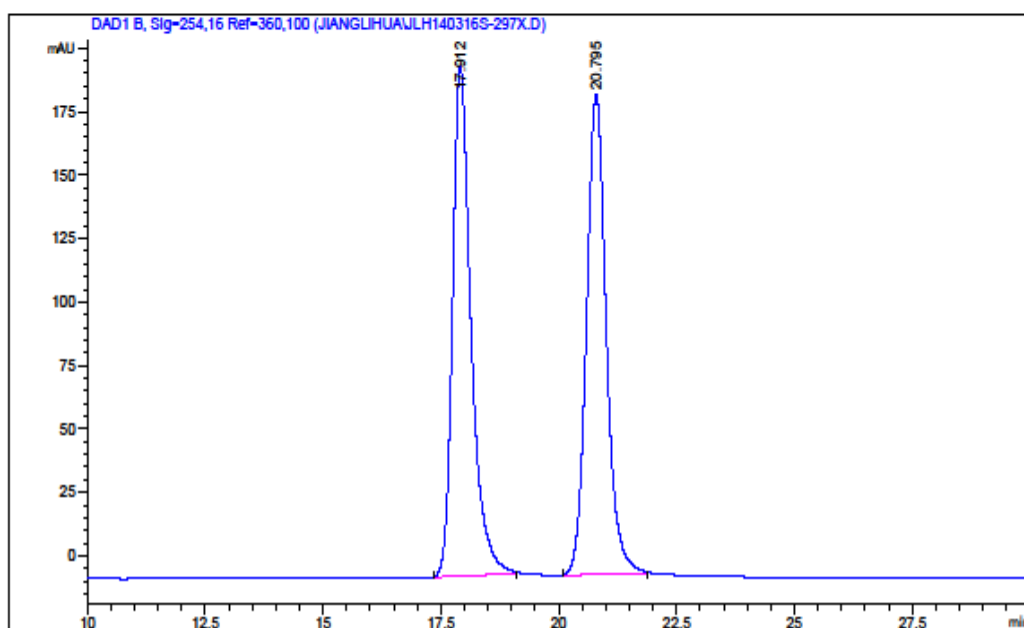

#### 面积百分比报告

```
=====
排序           :      信号
乘积因子:      :      1.0000
稀释因子:      :      1.0000
内标使用乘积因子和稀释因子
=====
```

信号 1: DAD1 B, Sig=254,16 Ref=360,100

| 峰 # | 保留时间 [min] | 类型 | 峰宽 [min] | 峰面积 [mAU*s] | 峰高 [mAU]  | 峰面积 %   |
|-----|------------|----|----------|-------------|-----------|---------|
| 1   | 17.912     | BB | 0.4072   | 5457.01563  | 200.69550 | 49.8723 |
| 2   | 20.795     | BB | 0.4422   | 5484.96973  | 189.23119 | 50.1277 |

总量 : 1.09420e4 389.92668

\*\*\* 报告结束 \*\*\*



数据文件: D:\CHEMSTATION DATA\JIANGLIHUA\JLH140316S-297.D  
 样品名称: JLH140316S-297

```
=====
操作者       : jlh                               位置 : 样品瓶 1
进样日期     : 16-Mar-14, 18:19:55
采集方法     : JLH2013.M
分析方法     : C:\CHEM32\1\METHODS\DEF_LC.M
最后修改     : 2014-3-26 9:28:41 : ///////////////////////////////////
              (调用后修改)
样品信息     : IA hex :2-Pro=90:10, 1mL/min, 45bar
=====
```

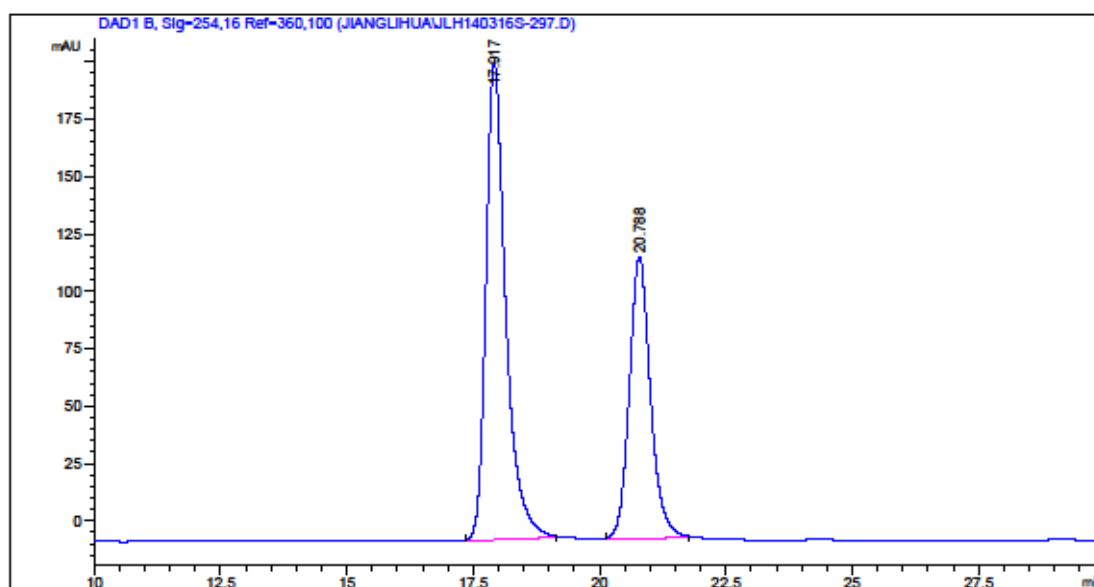

=====  
 面积百分比报告  
 =====

```
排序           :      信号
乘积因子       :      1.0000
稀释因子       :      1.0000
内标使用乘积因子和稀释因子
```

信号 1: DAD1 B, Sig=254,16 Ref=360,100

| 峰 # | 保留时间 [min] | 类型 | 峰宽 [min] | 峰面积 [mAU*s] | 峰高 [mAU]  | 峰面积 %   |
|-----|------------|----|----------|-------------|-----------|---------|
| 1   | 17.917     | BB | 0.4079   | 5661.42920  | 207.73802 | 61.3461 |
| 2   | 20.788     | BB | 0.4434   | 3567.23877  | 122.62032 | 38.6539 |

总量 : 9228.66797 330.35834

=====  
 \*\*\* 报告结束 \*\*\*  
 =====

HPLC spectra of compound **4q** (racemic and chiral product):

数据文件: D:\CHEMSTATION DATA\JIANGLIHUA\JLH140318S-296X.D  
 样品名称: JLH140318S-296X

```
=====
操作者       : jlh                               位置 : 样品瓶 1
进样日期     : 18-Mar-14, 14:15:59
采集方法     : JLH2013.M
分析方法     : C:\CHEM32\1\METHODS\DEF_LC.M
最后修改     : 2014-3-26 9:28:41 : ///////////////
              (调用后修改)
样品信息     : IA hex :2-Pro=90:10,1mL/min, 45bar
=====
```

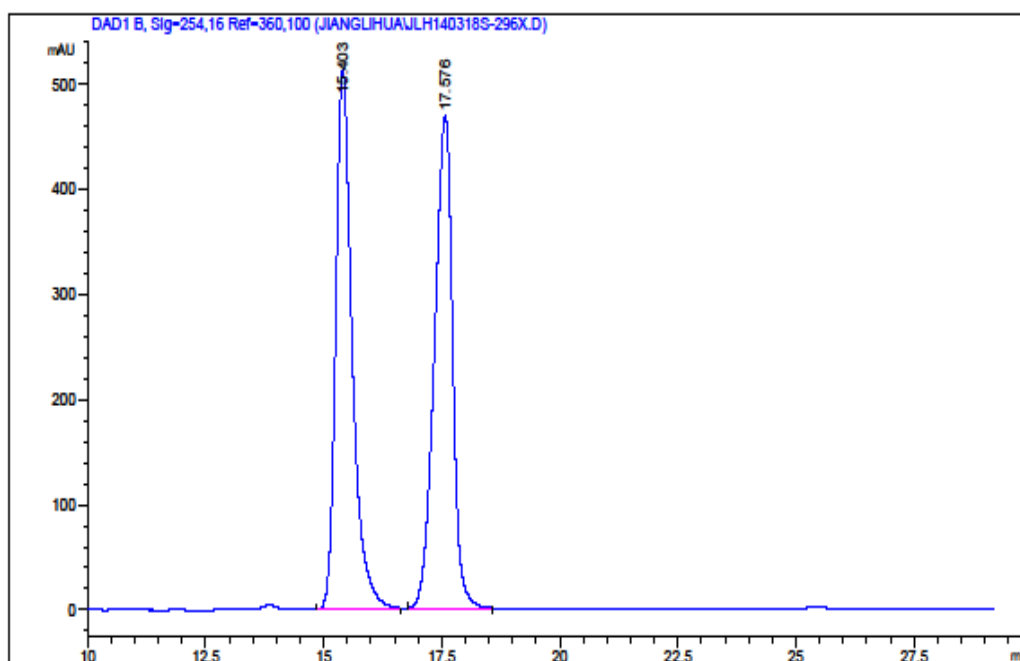

=====  
 面积百分比报告  
 =====

```
排序       :      信号
乘积因子:      :      1.0000
稀释因子:      :      1.0000
内标使用乘积因子和稀释因子
```

信号 1: DAD1 B, Sig=254,16 Ref=360,100

| 峰 # | 保留时间 [min] | 类型 | 峰宽 [min] | 峰面积 [mAU*s] | 峰高 [mAU]  | 峰面积 %   |
|-----|------------|----|----------|-------------|-----------|---------|
| 1   | 15.403     | BB | 0.3642   | 1.24499e4   | 514.62091 | 49.8433 |
| 2   | 17.576     | BB | 0.4134   | 1.25282e4   | 469.39468 | 50.1567 |

总量 : 2.49781e4 984.01559

\*\*\* 报告结束 \*\*\*

数据文件: D:\CHEMSTATION DATA\JIANGLIHUA\JLH140318S-296.D  
 样品名称: JLH140318S-296

```
=====
操作者       : jlh                               位置 : 样品瓶 1
进样日期     : 18-Mar-14, 14:47:10
采集方法     : JLN2013.M
分析方法     : C:\CHEM32\1\METHODS\DEF_LC.M
最后修改     : 2014-3-26 9:28:41 : ////////////////
              (调用后修改)
样品信息     : IA hex :2-Pro=90:10,1mL/min, 45bar
=====
```

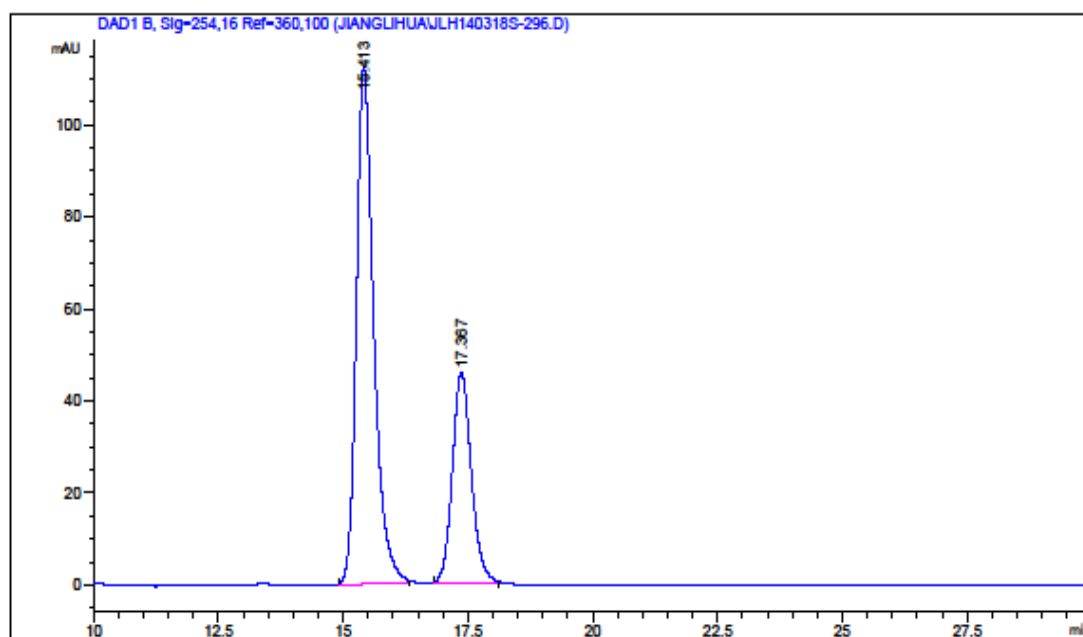

=====  
 面积百分比报告  
 =====

```
排序       :      信号
乘积因子:      :      1.0000
稀释因子:      :      1.0000
内标使用乘积因子和稀释因子
```

信号 1: DAD1 B, Sig=254,16 Ref=360,100

| 峰 # | 保留时间 [min] | 类型 | 峰宽 [min] | 峰面积 [mAU*s] | 峰高 [mAU]  | 峰面积 %   |
|-----|------------|----|----------|-------------|-----------|---------|
| 1   | 15.413     | BB | 0.3608   | 2707.65039  | 112.49154 | 69.2675 |
| 2   | 17.367     | BB | 0.4000   | 1201.32849  | 45.80671  | 30.7325 |

总量 : 3908.97888 158.29824

=====  
 \*\*\* 报告结束 \*\*\*  
 =====
